## **Transposable element dynamics are consistent across the *Drosophila* phylogeny, despite drastically differing content**

Tom Hill<sup>1\*</sup>

1. 4012 Haworth Hall, The Department of Molecular Biosciences, University of Kansas, 1200 Sunnyside Avenue, Lawrence, KS 66045. Email: tom.hill@ku.edu

\* Corresponding author

**Keywords:** Transposable elements, *Drosophila*, fitness.

## 1 **Abstract**

2 The evolutionary dynamics of transposable elements (TEs) vary across the tree of life and even  
3 between closely related species with similar ecologies. In *Drosophila*, most of the focus on TE  
4 dynamics has been completed in *Drosophila melanogaster* and the overall pattern indicates that  
5 TEs show an excess of low frequency insertions, consistent with their fitness cost in the genome.  
6 However, work outside of *D. melanogaster*, in the species *Drosophila algonquin*, suggests that  
7 this situation may not be universal, even within *Drosophila*. Here we test whether the pattern  
8 observed in *D. melanogaster* is similar across five *Drosophila* species that share a common  
9 ancestor more than fifty million years ago. We find that, for most TE families and orders, the  
10 patterns are broadly conserved between species, suggesting TEs are primarily costly, and dynamics  
11 are conserved in orthologous regions of the host genome. These results suggest that most TEs  
12 retain similar activities and fitness costs across the *Drosophila* phylogeny suggesting little  
13 evidence of drift in the dynamics of TEs across the phylogeny.

14

## 15 **Introduction**

16 Transposable elements are selfish mobile genetic elements found throughout the genomes  
17 of a majority of living organisms; these sequences copy and move throughout hosts genomes,  
18 mostly to the detriment of the host (McClintock 1953; Orgel and Crick 1980; Charlesworth and  
19 Langley 1989; Burt and Trivers 2006; Wicker *et al.* 2007). Mammals, have few active transposable  
20 elements (TEs), a large proportion of their genomes are composed of TE insertions fixed within a  
21 species population (Hellen and Brookfield 2013a; b). Comparatively, TEs in the fruit fly  
22 *Drosophila* appear to be highly active, resulting in polymorphic insertions for most TE families  
23 within a species population, with a lower proportion of their genome comprised of TEs  
24 (Charlesworth and Langley 1989; Charlesworth *et al.* 1997).

25 These differences can be explained with a model described by Lee and Langley (Lee and  
26 Langley 2010). TE insertions are primarily deleterious to the host; their insertion can interrupt a  
27 gene, cause aberrant expression or differential exon expression (Charlesworth and Langley 1989;  
28 Burt and Trivers 2006; Lee and Langley 2010, 2012). Without regulation, TEs are also rampantly  
29 expressed and transposing (Lee and Langley 2010; Blumenstiel 2011). To combat this, TE activity  
30 is suppressed, in the case of most animals, via the piRNA system (Aravin *et al.* 2007; Brennecke

31 *et al.* 2007, 2008; Lu and Clark 2010). Using small RNAs transcribed from TE sequences, the  
32 piRNA system targets and degrades complementary TE mRNAs and cause heterochromatin  
33 formation on similar TE insertions (Obbard *et al.* 2009; Blumenstiel 2011; Lee 2015; Senti *et al.*  
34 2015). Within this suppression system, the extent of silencing is then dependent on the expression  
35 and copy number of TEs, resulting in the copy number regulation seen in *Drosophila* (Lee and  
36 Langley 2010). However, the piRNA system can cause the propagation of heterochromatic  
37 silencing marks around TE insertions, resulting in the silencing of nearby genes and position effect  
38 variegation (Lee and Langley 2010; Lee 2015). This deleterious side effect, in combination with  
39 the deleterious effects of TE insertions suggests TE insertions should be rare in euchromatic  
40 regions (Charlesworth and Langley 1989; Charlesworth *et al.* 1997; Lee and Langley 2010).

41         Within this model, TEs will enter a genome and spread rapidly through a burst of  
42 unsuppressed transposition (Kofler *et al.* 2012; Lee and Langley 2012). The TE will be silenced  
43 via the piRNA system and regulated so long as piRNAs are produced against the TE (Senti and  
44 Brennecke 2010; Blumenstiel 2011). Following this, you should expect larger genomes with fewer  
45 active TEs, such as mammals, to have higher TE abundances and TE insertion frequency spectra  
46 (IFS) showing no skew towards rare insertions as TE insertions are on average, less costly (Figure  
47 1) (Lee and Langley 2012; Hellen and Brookfield 2013a; Lee 2015). While species with higher  
48 effective population sizes, higher coding densities and more active TEs, such as *Drosophila*  
49 *melanogaster*, should have lower abundances of TEs and IFS skewed to rare insertions (Lee and  
50 Langley 2010; Petrov *et al.* 2011; Kofler *et al.* 2012, 2015b).

51

52 **Figure 1:** Schematic depicting the model explaining the differences seen between mammals and  
 53 *Drosophila*, with species analyzed previously in red, species analyzed here in blue. Species have  
 54 been placed in the schematic based on 1 – the insertion frequency spectrum relative to mammals  
 55 and *D. melanogaster*, and 2 – TE abundances compared to mammals and *D. melanogaster*.

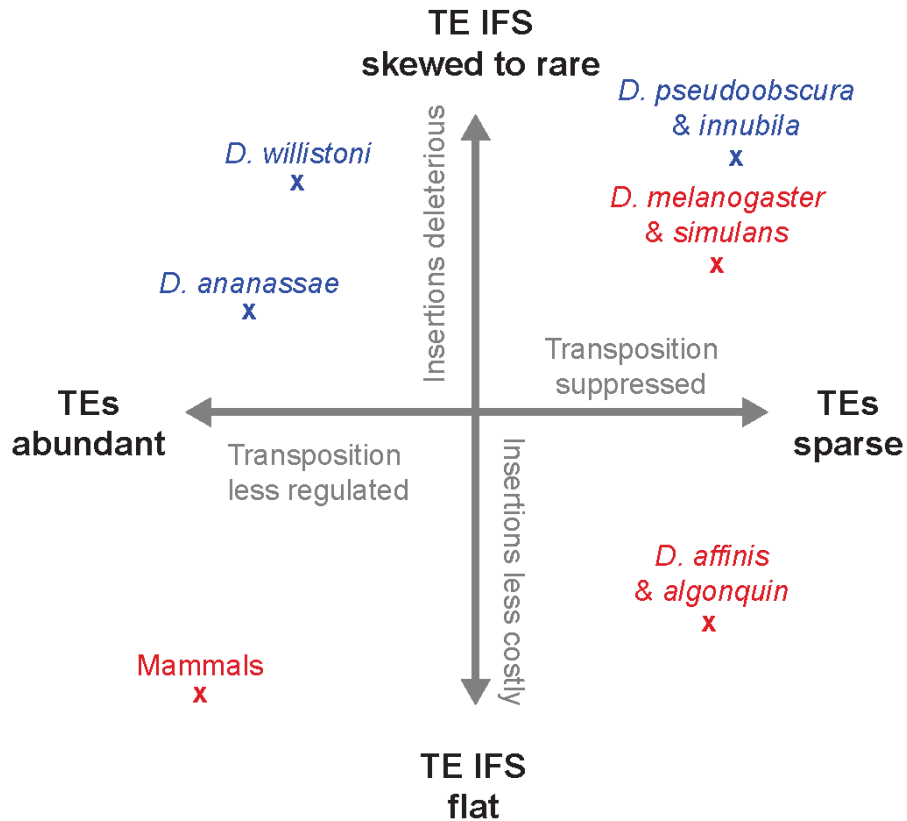

56  
 57

58 However, the expectation of lower euchromatic TE abundances, consistent with higher  
 59 coding densities seen in *Drosophila melanogaster* is not seen in all *Drosophila* species (Clark *et*  
 60 *al.* 2007). The dynamic nature of *Drosophila* TEs can be clearly seen in the 12-genomes project,  
 61 a group of 12 sequenced *Drosophila* species genomes, that span the ~50 million year *Drosophila*  
 62 genus, with species in both the *Drosophila* and *Sophophora* sister subgenera (Markow and  
 63 O'Grady 2006; Clark *et al.* 2007). The sequenced species, show striking differences between TE  
 64 families and orders, and make up differing proportions of the genome, between 5 and 40% across  
 65 the tree (Sessegolo *et al.* 2016). Additionally, the TE content of two species in the *D. affinis*

66 subgroup, is not comprised of lower copy number families with an excess of low frequency  
67 insertions (Hey 1989). Instead they have a few, highly abundant families, with many high  
68 frequency insertions, like mammalian genomes, despite their small genome and large effective  
69 population sizes (McGaugh *et al.* 2012; Palmieri *et al.* 2014). Though the methods used in this  
70 study are not truly comparable to modern techniques of assessing TE abundances, together with  
71 the diversity of abundances in the 12 genomes it brings into question the extent to which the  
72 previously described model fits outside the *D. melanogaster*, and where within the frame work  
73 other species fit (Hey 1989; Clark *et al.* 2007).

74 Here, we use next generation sequencing data and modern TE content identification  
75 methods to assess the TE insertion densities and TE insertion frequency spectra of the euchromatic  
76 genome of five *Drosophila* species. We attempt to identify if TEs show patterns consistent with  
77 insertions being rare and primarily deleterious, or if they differ between species with differing  
78 abundances of TEs. We find that despite differing TE abundances and euchromatic insertion  
79 densities between species, most TE insertions have an IFS consistent with families being highly  
80 active and deleterious in all species, though some individual families differ in their insertion  
81 frequencies between species (Figure 1). This suggests that TEs remain consistently deleterious  
82 across the *Drosophila* phylogeny, despite strong phylogenetic differences between species, and  
83 large changes in effective population size and TE densities (Sessegolo *et al.* 2016).

84

## 85 **Results**

### 86 **TE content differs drastically across the species examined**

87 To examine the abundance and fitness cost of TE insertions across our *Drosophila* phylogeny of  
88 five species (Figure 1, 2A), we generated profiles of the TE content of each species using a  
89 combination of *RepeatMasker*, *BEDTools* and *PopoolationTE2* (Tarailo-Graovac and Chen 2009;  
90 Quinlan and Hall 2010; Kofler *et al.* 2011b). We estimated the proportion of each genome made  
91 up of TE insertions (Tarailo-Graovac and Chen 2009; Quinlan and Hall 2010; Kofler *et al.* 2016),  
92 the median copy number of each TE family and the median insertion number of each family in the  
93 euchromatic portion of the genome. We grouped families by their orders, either terminal inverted  
94 repeat (TIR) and rolling circle (RC) DNA transposons, or long terminal repeat (LTR) and long  
95 interspersed nuclear elements (LINE) RNA retrotransposons (Kohany *et al.* 2006; Wicker *et al.*  
96 2007). Within each species, the TE content varies drastically – between 15% and 40% of each

97 genome (Figure 2B), with consistently different numbers of TE copies and euchromatic insertions  
98 between species (Figure 2B). As identified elsewhere, there is a significant association between  
99 genome size and TE content, as found previously (Supplementary Table 2,  $p$ -value = 0.00176)  
100 (Gregory 2005; Wicker *et al.* 2007; Gregory and Johnston 2008).

101 The recently assembled and annotated genome of *D. innubila* has considerably lower  
102 insertion count numbers, perhaps due to the inferior annotation of TE content compared to other  
103 species. Interestingly, the *D. innubila* genome appears to have a lower amount of LTRs than most  
104 other studied *Drosophila* species (Hill *et al.* 2019), showing a similar profile to the relatively  
105 closely related *D. mojavensis* (Sessegolo *et al.* 2016). Most other species have retrotransposons,  
106 such as LTRs and LINEs, making up a large proportion of their repeat content (Figure 2B) (Clark  
107 *et al.* 2007). As shown previously, *D. ananassae* and *D. willistoni* have much higher TE content  
108 than the other species analyzed here (Clark *et al.* 2007; Sessegolo *et al.* 2016). These species differ  
109 in genome size, including an expanded Muller Element F in *D. ananassae* (Clark *et al.* 2007;  
110 Leung and Students 2017). In fact, there is an excess of TE content in *D. ananassae* on Muller  
111 element F. This element this represents only ~11.6% of the assembled reference genome (based  
112 on *D. melanogaster* orthology) but contains ~21.1% of the reference genomes TE content (based  
113 on *RepeatMasker* estimates), and so may account for the differences seen here.

114 To control for this Muller element expansion and other differences in genome size, we  
115 measured the TE insertion density per autosomal euchromatic megabase and found a significant  
116 excess of TE insertions per MB in *D. ananassae* and *D. willistoni* versus all other species, in all  
117 TE orders (Figure 2C, quasi-Poisson GLM,  $z$ -value > 19.296,  $p$ -value < 0.000565). These  
118 differences in TE abundances suggest that TE insertions may have differing dynamics between  
119 species, even when excluding TE rich regions. Due to the larger genomes and more abundant TE  
120 insertions, insertions may be less costly in *D. ananassae* and *D. willistoni* compared to other  
121 species and so may be more common in populations, with IFS skewed towards higher frequencies  
122 (Aravin *et al.* 2007; Blumenstiel 2011; Levine and Malik 2011).

123  
124  
125  
126

127 **Figure 2.** Transposable Element content (separated by TE order) in populations of five *Drosophila*  
 128 species. TE content shown as **A.** Cartoon of tree of species assessed here, branches do not  
 129 accurately represent the distance between species. **B.** Estimated TE profiles including TE  
 130 proportions of each genome, median TE coverage, weighted by median nuclear coverage, and  
 131 median TE insertion number. TIR & RCs were combined due to small numbers of either for many  
 132 species. **C.** TE density per 1 Mb windows across the genome for each species and TE order.

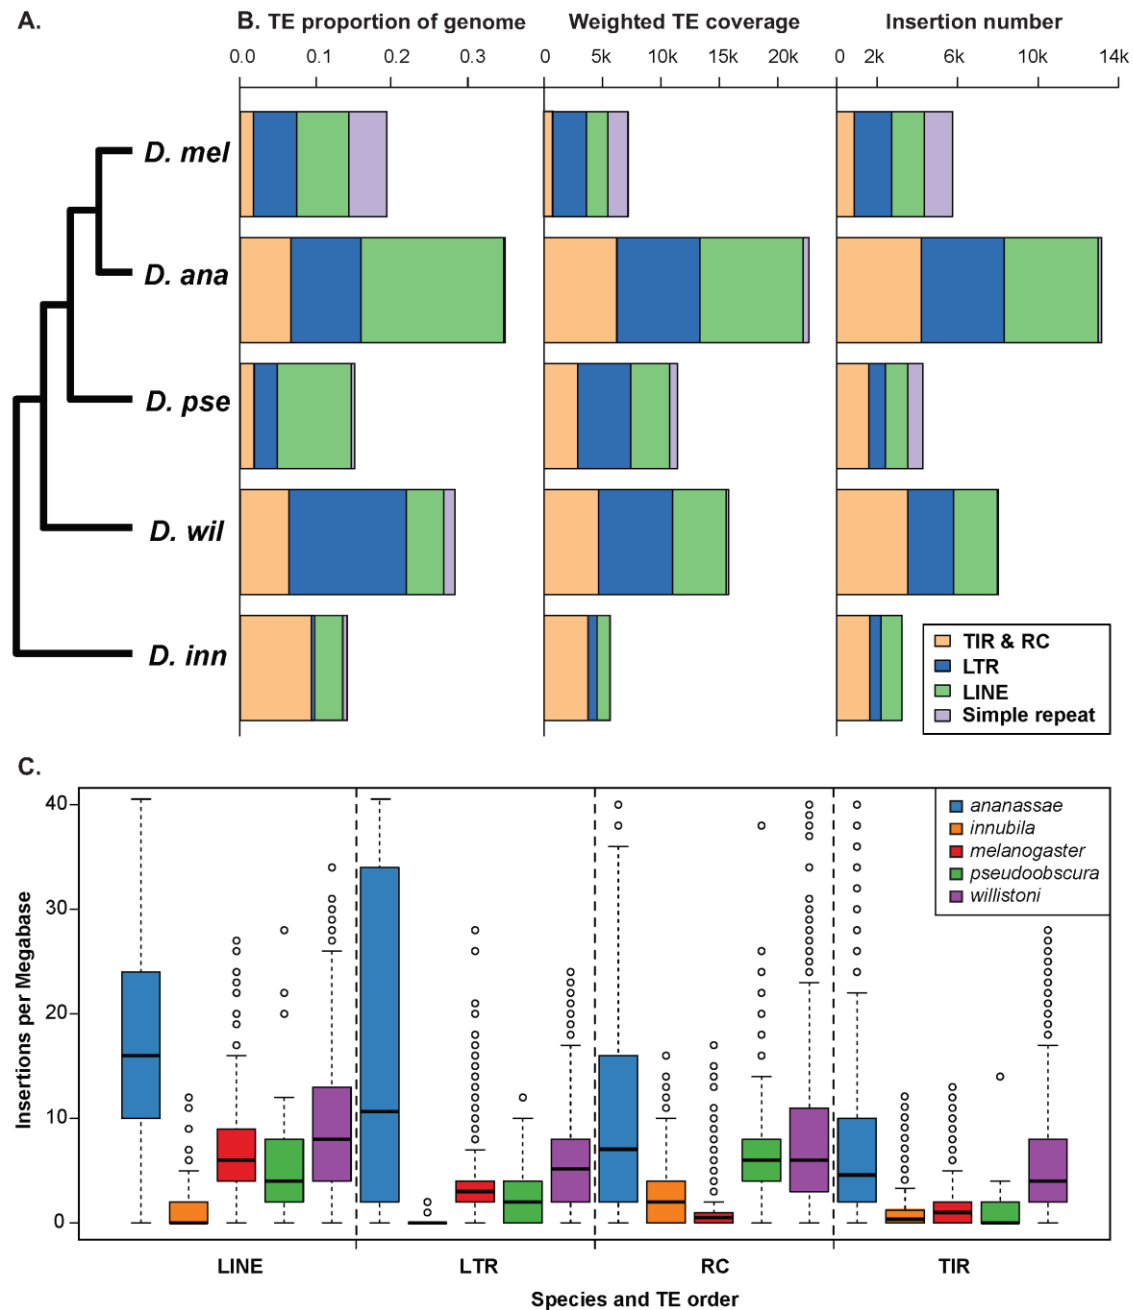

133

134 **TE insertions are primarily rare across the *Drosophila* phylogeny**

135 Using the TE insertions called with *PopoolationTE2*, we found the insertion frequency spectrum  
136 (IFS) across each TE order, across all species, limited to the autosomes (Kofler *et al.* 2016). Like  
137 the differing TE insertion numbers and densities across species (Figure 2), the IFS also differ  
138 (Supplementary Figure 1, Supplementary Table 2 & 3). Comparing IFSs between TE orders, we  
139 find a significant excess of high frequency RC insertions in *D. melanogaster* versus other species  
140 (GLM quasi-Binomial  $p$ -value  $< 3.5e-5$ ,  $t$ -value  $> 4.151$ ). We also find an excess of rare (low  
141 frequency) TIR insertions versus other species in *D. innubila* ( $p$ -value =  $2.37e-5$ ,  $t = -4.24$ ) and *D.*  
142 *pseudoobscura* ( $p$ -value =  $5.74e-15$ ,  $t$ -value =  $-7.891$ ). Additionally, we find a significant excess  
143 of high frequency LTR insertions in *D. ananassae* versus all other species (GLM  $p$ -value  $< 2e-16$ ,  
144  $t$ -value =  $13.243$ ) and an excess of higher frequency LINE insertions in both *D. melanogaster*  
145 (GLM  $p$ -value  $< 2e-16$ ,  $t = 12.526$ ) and *D. ananassae* (GLM  $p$ -value  $< 2e-16$ ,  $t=11.505$ ). While  
146 we find IFS differ between species, in all cases TEs are skewed towards rare insertions (Figure 1).  
147 The median insertion frequency is below 25% in every TE order across all species and shows no  
148 significant differences between species (Supplementary Table 2 & 3, GLM  $p$ -value  $> 0.213$ ).

149 As these comparisons may be biased by factors such as how the data was generated, the  
150 sequencing methods, the quality of the reference genomes and the TE annotation, we limited our  
151 analysis to *D. melanogaster*, *D. ananassae* and *D. willistoni*, three species with data generated in  
152 similar manners, with similar TE families and high-quality reference genomes. We assessed only  
153 insertions in regions of the autosomal genome identified as orthologous using *progressiveMauve*  
154 (Darling *et al.* 2004). When comparing the insertions in these orthologous regions, for all  
155 comparisons we find the TE dynamics are more consistent between species, with no significant  
156 differences in any comparison (Supplementary Table 2, Figure 2, Supplementary Figure 1B: GLM  
157  $p$ -value  $> 0.21$ ,  $t$ -value  $< 1.556$ ).

158

159 **TE site frequency spectra rarely differ when accounting for population structure, insertions  
160 are primarily rare**

161 One limitation of the analysis thus far is that all samples except *D. melanogaster* violate our  
162 implicit assumption of a single, panmictic population, which may skew the IFS to higher  
163 frequencies. This is can be seen in differences in estimated nucleotide site frequency spectrum of  
164 each species (limited to Muller element C for *D. pseudoobscura*), specifically finding an excess of



165 high frequency variants in *D. pseudoobscura* when compared to *D. melanogaster* and an excess of  
166 low frequency variants in *D. willistoni* and *D. innubila* when compared to *D. melanogaster*  
167 (Supplementary Figure 2, GLM quasi-Binomial  $p$ -value  $< 0.05$ ). As expected, all SFS show an  
168 excess of rare variants consistent with purifying selection, however *D. pseudoobscura* almost fits  
169 the neutral expectation, possibly due to the structured populations expected with the segregating  
170 inversions found on Muller element C (Dobzhansky and Sturtevant 1937; Dobzhansky and Epling  
171 1948; Fuller *et al.* 2016).

172 To combat this, we clustered lines based on nuclear polymorphism using a principle  
173 component analysis (Supplementary Figure 3). We then took a subset of lines for each species  
174 which appears to cluster as a single group in a principle component analysis (Supplementary  
175 Figure 3). We also attempted to account for effective population size, on TE content, we find no  
176 association between effective population size and total TE content or insertion density, so did not  
177 control for this further (LM  $p$ -value  $> 0.05$ , Supplementary Figure 3).

178 In selected subpopulations, we checked for differences in the nuclear SFS between species  
179 and, with no drastic differences seen, we compared TE insertion SFSs between species. We find  
180 similar IFS across TE orders, though we do find an excess of high frequency RC insertions in *D.*  
181 *melanogaster* and an excess of high frequency LTR and LINE insertions in *D. ananassae* (Figure  
182 3A, GLM  $p$ -value =  $2e-16$ ). Again, we find no significant differences when comparing orthologous  
183 regions (GLM  $p$ -value  $> 0.05$ ). As previous, most TE insertions are rare in all species (median  
184 frequency  $< 20\%$ ), with *D. ananassae* and *D. melanogaster* having the highest median frequency  
185 insertion, we also find no significant difference between median insertion frequency for any  
186 species or TE order (GLM  $p$ -value  $> 0.352$ ) and no association between TE density or genome  
187 size with median insertion frequency ( $p$ -value  $> 0.05$ ).

188

189 **Figure 3:** Site frequency spectra for each species, separated by TE order for, A. TE insertions  
190 found across total genomes of all species. B. TE insertions called in orthologous regions for *D.*  
191 *melanogaster*, *D. willistoni* and *D. ananassae*.

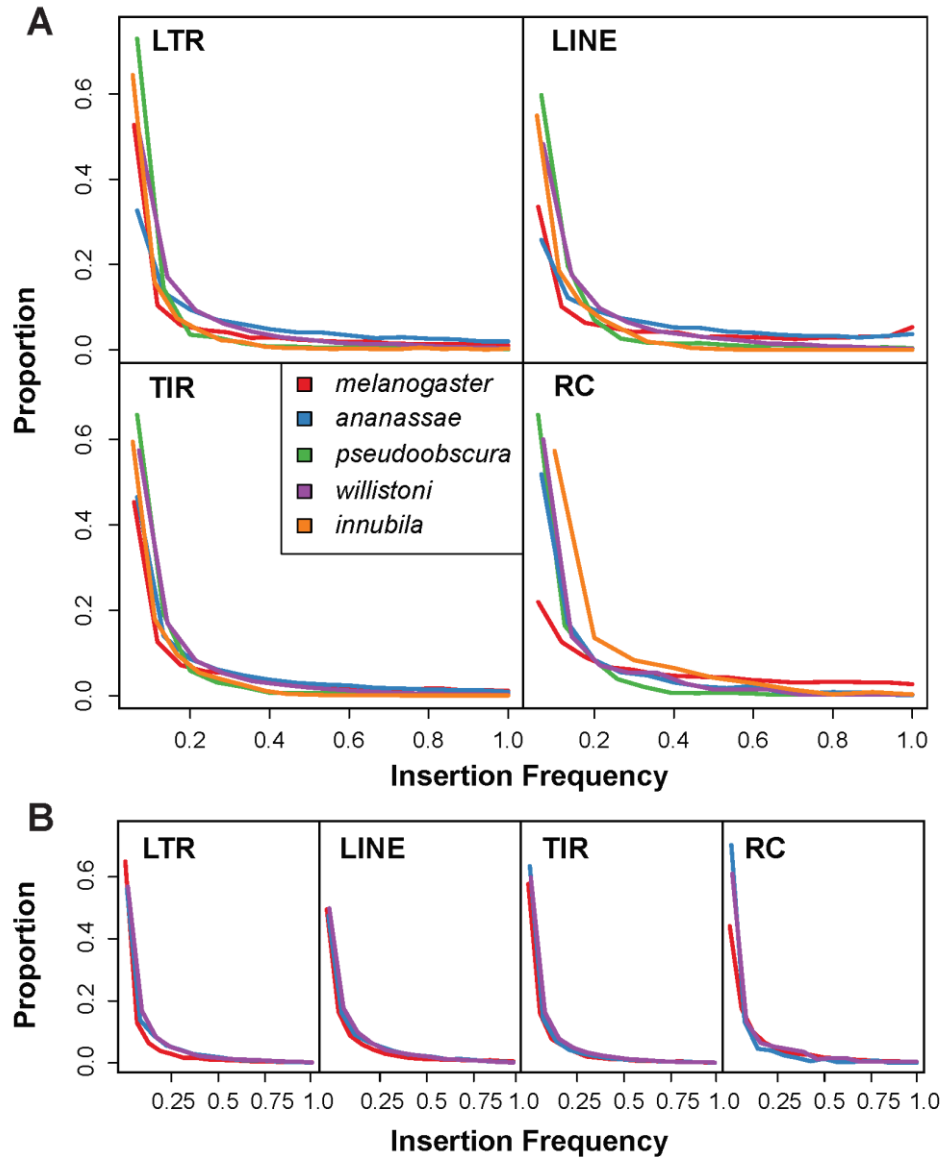

192

193

194 **Only a few, highly active, families differ across species, consistent with differing times of**  
195 **invasion**

196 Our broader comparisons fit with previous work that suggests that most TEs are highly active  
197 across a broad species range due to recent acquisition of these TEs (Petrov *et al.* 2011; Kofler *et*  
198 *al.* 2015b), as opposed to other work that suggested TE activity differs between species and  
199 families (Hey 1989; Linheiro and Bergman 2012; Rahman *et al.* 2015). As these broad

200 observations may homogenize large differences between TE families, we chose to focus our  
201 analysis on specific families, shared between species.

202 We repeated the previous analysis across 10 TE super families found in all species. While  
203 there is a noticeable excess of low frequency insertions in *D. pseudoobscura*, we found no  
204 significant difference of insertion frequency between species for TE super family frequency (GLM  
205 logistic regression:  $-1.351 < t\text{-value} < -0.092$ ,  $p\text{-value} > 0.183$ ), however this may be due to few  
206 TE insertions in each subgroup or could again be too broad for any real inference (Supplementary  
207 Figure 4).

208 Thus, we attempted to compare the dynamics of specific families shared between these  
209 species. We found 55 families shared between *D. melanogaster*, *D. ananassae* and *D. willistoni*,  
210 and found insertions within the previously identified orthologous regions. For each TE family we  
211 compared the site frequency spectrums for each species. Most these TE families showed no  
212 consistent significant differences in TE activity, with only 8 of the 55 TE families showing any  
213 significant differences (six after multiple testing correction, Supplementary Table 3-5,  
214 Supplementary Figure 5, GLM logistic regression:  $p\text{-value} < 0.05$ ). For these elements, one species  
215 has an excess of low frequency variants compared to the other two species (Supplementary Figure  
216 5), suggesting this difference may be due to a more recent acquisition than in this species, resulting  
217 in higher activity of the family, rather than a consistent difference in activity between species  
218 (Bergman and Bensasson 2007; Petrov *et al.* 2011; Kofler *et al.* 2012).

219 To test this, we calculated Tajima's D for each of the shared 55 TE families. A negative  
220 Tajima's D suggests an excess of low frequency variants, consistent with an expansion in copy  
221 number following a bottleneck, as would happen with a recent horizontal invasion (Tajima 1989;  
222 Bartolomé *et al.* 2009). Among the 55 shared families, we find ten TE families have significant  
223 differences in estimations of Tajima's D between species (GLM  $p\text{-value} < 0.05$ ). Only one TE  
224 family overlaps with significantly negative Tajima's D and a difference in IFS between species,  
225 potentially explained by a more recent invasion of that TE family (Kofler *et al.* 2015a). *P*-element  
226 has a significantly different site frequency spectra between species (GLM logistic regression:  $p\text{-value} < 0.05$ ), and significantly lower Tajima's D (GLM  $p\text{-value} < 0.05$ ), due to its recent  
227 horizontal transfer to *D. melanogaster* from *D. willistoni* (Daniels *et al.* 1990; Khurana *et al.* 2011).  
228 Overall these results suggest few TE families differ between species in activity, after accounting  
229 for recent acquisitions.  
230

231

## 232 **Discussion**

233 Transposable elements, as mobile parasitic elements, are mostly costly to a host organism  
234 (Charlesworth and Langley 1989), due to their rampant transposition, leading to the disruption of  
235 coding sequences (Charlesworth and Langley 1989; Charlesworth *et al.* 1997; Bachmann and  
236 Knust 2008), the misregulation of gene expression (McClintock 1953; Lisch and Bennetzen 2011;  
237 Lee 2015) and even because of ectopic recombination and chromosomal breakage between two  
238 copies of the same TE family (Charlesworth and Langley 1989; Montgomery *et al.* 1991;  
239 Sniegowski and Charlesworth 1994). Deleterious insertions are removed under purifying selection  
240 and TE families are rapidly silenced upon their acquisition (Langley *et al.* 1988; Montgomery *et*  
241 *al.* 1991; Lee and Langley 2012), giving an expectation for a site frequency spectrum skewed  
242 towards low frequency insertions for more recently active families (Langley *et al.* 1988;  
243 Charlesworth and Langley 1989; Montgomery *et al.* 1991; Charlesworth *et al.* 1997; Pasyukova  
244 *et al.* 2004). Most of the theoretical and experimental work that led to our understanding of TE  
245 dynamics has been completed in *D. melanogaster* (Charlesworth and Langley 1989; Charlesworth  
246 *et al.* 1997; Petrov *et al.* 2003), under the assumption that TEs in other *Drosophila* and insects  
247 behave in a similar manner, despite some evidence to the contrary (Hey 1989; Kaminker *et al.*  
248 2002a; Bergman and Bensasson 2007). Here we test the validity of this assumption by assessing  
249 the TE dynamics in a *D. melanogaster* population and populations of four other increasingly  
250 diverged species. We find that, despite the drastic differences in TE content and densities between  
251 the species (Figure 2), we observe a pattern of rare insertions across all species, consistent with  
252 strong purifying selection against TE insertions in all species (Figure 3, Supplementary Figure 1,  
253 Supplementary Table 2 & 4), and the activity of similar families are also mostly conserved between  
254 species.

255         There are several possible explanations for the fact that work predating next generation  
256 sequencing technologies suggested differences in TE dynamics among species (Hey 1989). First,  
257 these differences may be due to host-specific factors (Supplementary Table 2 - 4, Supplementary  
258 Figure 1 & 4), such as how recent the TE family has been established in a species (Hey 1989;  
259 Kaminker *et al.* 2002b). Second, high copy number families identified by *In Situ* hybridisation  
260 may have be low resolution conflating separate insertions as the same insertion, artificially  
261 inflating that insertion's frequency and skewing its frequency higher than in lower copy number

262 samples (Hey 1989). Finally, species genomes may differ in their chromatin states at different parts  
263 of genomes, limiting our analyses to well described euchromatic portions could have limited our  
264 ability to identify the diversity of TE dynamics in these host species. *D. ananassae*, for example,  
265 has an expansive Muller element F, full of transposable elements that was not included in this  
266 survey (due to most the chromosome being masked in the reference genome).

267 Overall, our results support a model where TE families invade of the genome, expand in  
268 copy number, are rapidly regulated by the host genome (to differing levels among species), with  
269 insertions primarily being deleterious in all species examined, though the selection against  
270 insertions appears to differ from species to species to a minor degree.

271

## 272 **Materials and Methods**

### 273 **Population genomic data**

274 We used next generation sequencing data from five species collected from three sources,  
275 summarized in Supplementary Table 1. For *Drosophila melanogaster*, we downloaded the FastQ  
276 files of 100bp paired end reads for a randomly selected set of 17 lines of the DPGP from a  
277 population collected from Zambia (SRA accessions: SRR203500-10, SRR204006-12). Similarly,  
278 we downloaded the FastQ files of 100bp paired end reads for 45 *Drosophila pseudoobscura* lines  
279 (SRA accessions: SRR617430-74). These lines consist of wild flies crossed to balancer stocks for  
280 chromosome 3 (Muller element C), this results in an isolated wild third chromosome, but a mosaic  
281 of balancer and wild stocks across the remainder of the genome, due to this we restricted our  
282 analysis to Muller element C (chromosome 3) in these lines.

283 We obtained sequencing information for 16 *Drosophila ananassae* isofemale lines and 14  
284 *willistoni* isofemale lines. These lines were sequenced using an illumina HiSeq 2500 to produce  
285 100bp paired end reads for each isofemale line.

286 Wild *Drosophila innubila* were captured at the Southwest Research Station in the  
287 Chiricahua Mountains between September 8<sup>th</sup> and 15<sup>th</sup>, 2016. Baits consisted of store-bought  
288 white button mushrooms (*Agaricus bisporus*) placed in large piles about 30cm in diameter. A  
289 sweep net was used to collect the flies over the baits. Flies were sorted by sex and species at the  
290 University of Arizona and males were frozen at -80 degrees C before being shipped on dry ice to  
291 Lawrence, KS. All *D. innubila* males were homogenized in 50 microliters of viral buffer (a media  
292 meant to preserve viral particles, taken from (Nanda *et al.* 2008)) and half of the homogenate was

293 used to extract DNA using the Qiagen Genra Puregene Tissue kit (#158689, Germantown,  
294 Maryland, USA). We constructed a genomic DNA library using a modified version of the Nextera  
295 DNA Library Prep kit (#FC-121-1031, Illumina, Inc., San Diego, CA, USA) meant to conserve  
296 reagents (Baym *et al.* 2015). We sequenced the library on two lanes of an Illumina HiSeq 2500  
297 System Rapid-Run to generate paired-end 150 base-pair reads (available at NCBI accession  
298 numbers SRR6033015).

299 We trimmed all data using *Sickle* (minimum length = 50, minimum quality = 20) before  
300 mapping, and removed adapter sequences using *Scythe* (Joshi and Fass 2011; Buffalo 2018).

### 301 **Custom reference genomes**

302 We downloaded the latest *Flybase* reference genome (Flybase.org, as of December 2018) for *D.*  
303 *melanogaster*, *D. ananassae*, *D. pseudoobscura* and *D. willistoni*, and used the *D. innubila*  
304 reference genome available on NCBI (NCBI accession: SKCT000000000) (Hill *et al.* 2019).

305 For the released genomes (*D. melanogaster*, *D. ananassae*, *D. pseudoobscura* and *D.*  
306 *willistoni*), we identified and masked each reference genome using *RepeatMasker* (parameters: -  
307 pa 4 -s -gff -gccalc -nolow -norna -no\_is) (Tarailo-Graovac and Chen 2009), using a custom  
308 repeat library, consisting of *Repbase* TE sequences previously identified in each of the species  
309 examined here (Kohany *et al.* 2006).

310 For *D. innubila*, we generated a repeat library for the reference genome using  
311 *RepeatModeler* (parameters: - engine NCBI) (Smit and Hubley 2008). Then, after identifying each  
312 family order by NCBI universal *BLAST* (Altschul *et al.* 1990), used this library as the custom TE  
313 library for repeat masking as described above. To validate these *RepeatModeler* consensus  
314 sequences for *D. innubila*, we mapped Illumina data to the TE library and kept only TE sequences  
315 with at least 1x the genomic coverage across 80% of the sequence (BWA MEM, default parameters  
316 (Li and Durbin 2009; Li *et al.* 2009)).

317 For each species, we then generated a custom reference genome required for the use of  
318 *PopoolationTE2* (Kofler *et al.* 2016). For this we merged the masked reference genome, the  
319 custom TE library used for masking and the genome TE sequences, extracted using *BEDTools*  
320 (Quinlan and Hall 2010). Next, as described in the *PopoolationTE2* manual, we generated a  
321 hierarchy for each genome which assigned each TE sequence (all consensus sequences and  
322 reference sequences) to a TE family and TE order as described in (Kohany *et al.* 2006; Wicker *et*



323 *al.* 2007), either terminal inverted repeat (TIR) and rolling circle (RC) DNA transposons, or long  
324 terminal repeat (LTR) and long interspersed nuclear element (LINE) RNA retrotransposons.

325

### 326 **TE content and copy number differences between genomes**

327 We quantified the amount of TE content for all species in three ways: a) proportion of the reference  
328 genome masked with *RepeatMasker*, b) median insertion count of each TE family across all lines  
329 in a species and c) median insertion count of each family using *PopoolationTE2*. For b), we found  
330 the median coverage for each TE family and the median coverage masked nuclear genome using  
331 *BEDTools* (*genomeCoverageBed*) (Quinlan and Hall 2010), we divided the median TE coverage  
332 by the median nuclear coverage (subsampling to 15x coverage) to find the copy number of each  
333 family. Then we calculated the median adjusted TE coverage across all lines for each species. For  
334 c), we calculated the median TE insertion count for each family in each species, based on TE  
335 insertions called using *PopoolationTE2*. To control for differences in genome size across  
336 euchromatic regions, we also calculated the insertions per 1 Megabase windows (sliding 250kbp)  
337 for each TE order in each line for each species, only for contigs greater than 100kbp with less than  
338 60% of the window masked by *RepeatMasker* (Tarailo-Graovac and Chen 2009).

339

### 340 **Calling transposable element insertions across genomes**

341 To identify the TE insertions throughout the genome in each line for each species, we followed  
342 the recommended *PopoolationTE2* pipeline for each species ([sourceforge.net/p/popoolation-  
343 te2/wiki/Walkthrough/](https://sourceforge.net/p/popoolation-te2/wiki/Walkthrough/)) (Kofler *et al.* 2016). Though *PopoolationTE2* is designed for use with  
344 population pools, we used an adjusted method to call germline insertions in individuals. We  
345 subsampled each line to 15x average nuclear coverage and followed the pipeline with appropriate  
346 cutoffs to exclude most somatic transpositions (*map-qual* = 15, *min-count* = 5, *min-distance* = -  
347 200, *max-distance* = 500). *PopoolationTE2* gives an estimated frequency of the insertion based on  
348 coverage of the TE breakpoint versus the genomic coverage, here we used this as a support score  
349 for each TE insertion (Kofler *et al.* 2016). We removed insertions found exclusively in one line  
350 with lower than 50% frequency in an individual line, we then merged all remaining insertion files  
351 for each species. We also removed all insertions in regions with more than 60% of the Megabase  
352 window masked by *RepeatMasker* (Tarailo-Graovac and Chen 2009), we also limited our analysis  
353 to scaffolds associated with autosomes in all species.

354 We used *BEDTools* (Quinlan and Hall 2010) to estimate the frequencies of each family's  
355 insertions across each species, combining TE insertions of the same family within 100bp of each  
356 other. We used a binomial GLM in R (Team 2013) to assess differences in insertion frequencies  
357 between species for each TE order, considering a significant effect of species compared to *D.*  
358 *melanogaster* for a p-value < 0.05 for each set of TE order insertion frequencies. If all species have  
359 a significant effect in a consistent direction, we consider this to be a significant effect of *D.*  
360 *melanogaster* on insertion frequency. We also compared the median insertion frequency across  
361 species and TE orders and again fit a GLM to compare in R (Team 2013).

362 For a less bias comparison of insertion frequency spectra, we limited our analyses to  
363 genomes with data generated in similar fashions (*D. melanogaster*, *D. ananassae*, *D. willistoni*),  
364 and to orthologous euchromatic regions of the genome. For this we used *progressiveMauve* to  
365 identify orthologous regions of each genome (Darling *et al.* 2004), then converted these regions  
366 into a bedfile and excluded regions below 100kb, with over 60% of bases masked. We excluded  
367 *D. innubila* from this comparison due to its high sequence divergence from all other species and  
368 difficulty in finding similar TE families in other species, and *D. pseudoobscura* as it only its Muller  
369 element C represented natural variation. We then extracted insertions found in the orthologous  
370 regions using *BEDTools* (Quinlan and Hall 2010) to compare insertion frequency spectra in  
371 orthologous regions.

372

### 373 **Polymorphism and summary statistics across the host genome and TE sequences**

374 We called polymorphism across the host nuclear genome using *GATK HaplotypeCaller* (DePristo  
375 *et al.* 2011) for each host and found the nuclear site frequency spectrum for each species using this  
376 data, which we confirmed using *ANGSD* (folded spectra, bootstraps = 100, reference sequence  
377 given, ancestral sequence not used) (Korneliussen *et al.* 2014). *ANGSD* was also used to perform  
378 a principle component analysis between samples in each species to look for population  
379 substructure (Korneliussen *et al.* 2014).

380

### 381 **Estimating the effective population size of species**

382 We used the previously generated folded site-frequency spectra from *ANGSD* in *StairwayPlot* for  
383 *D. melanogaster*, *D. innubila*, *D. ananassae* and *D. willistoni* (excluding *D. pseudoobscura* due to  
384 the method of the data generation) (Korneliussen *et al.* 2014; Liu and Fu 2015). For each estimated



385 effective population size back in time, we found the harmonic mean of the effective size in the  
386 past 100,000 years and took that as the average size for the line. We then compared the TE copy  
387 number estimations to effective population size.

388

### 389 **TE families with dynamics differing between species**

390 We next wanted to identify TE families shared between species to identify differences in activity  
391 between species. We aligned families of the same superfamily (defined in the *Repbase* TE database  
392 (Kohany *et al.* 2006)) from each species using *MAFFT* and considered families within 95%  
393 identity to be the same family in different species (Kato *et al.* 2002). We then compared the site  
394 frequency spectrum of these species using a logistic regression GLM. We also tested for  
395 differences in population genetic statistics to assess if differences are due to the recent acquisition  
396 of a family in a species. We calculated Watterson's theta, pairwise diversity and Tajima's D using  
397 *Popoolation* (Kofler *et al.* 2011a), then compared these statistics across family and species using  
398 a generalized linear model, noting significant interactions between species and TE family.

399

### 400 **Abbreviations**

401 TE = transposable element, TIR = terminal inverted repeat, LTR = long terminal repeat, LINE =  
402 long interspersed nuclear element, RC = rolling circle, GLM – generalized linear model, IFS =  
403 insertion frequency spectra.

404

### 405 **Declarations**

406 *Ethics approval and consent to participate*

407 Not applicable

408 *Consent for publication*

409 Not applicable

410 *Funding*

411 This work was supported by a postdoctoral fellowship from the Max Kade foundation (Austria)  
412 and a K-INBRE postdoctoral grant (NIH Grant P20 GM103418) to TH.

413

414 *Competing Interests*

415 The author declares that they have no competing interests.

416 *Authors' contributions*

417 TH performed bioinformatics analysis, statistical analysis, wrote, read and approved the  
418 manuscript.

419 *Data availability*

420 *D. pseudoobscura* data available on NCBI SRA: SRR617430- SRR617474. *D. melanogaster* data  
421 available on NCBI SRA: SRR203500-10, SRR204006-12. *D. ananassae*, *D. willistoni* and *D.*  
422 *innubila* data will be made available upon publication. *Drosophila* genomes can be downloaded  
423 from Flybase.org or NCBI. All data is available upon request before acceptance.

424

425 *Acknowledgements*

426 We are extremely grateful for the advice provided by R. Unckless and J. Blumenstiel, for providing  
427 the sequencing information, advice on analysis and the production of the manuscript. We are also  
428 grateful for helpful discussion provided by J. R. Chapman, A. J. Betancourt, C. Schlotterer, R.  
429 Kofler, and B. Charlesworth. Thanks for S. W. Schaeffer for providing the *D. pseudoobscura* data  
430 used in this survey and advice concerning how the data should be used.

431

432 **Supplementary Table 1:** Table of *Drosophila* strains used in this study, including information on  
433 species, collection location and SRA number.

434 **Supplementary Table 2:** Comparison of TE insertion frequencies between species and the fit of  
435 GLMs at different levels showing significant differences between species.

436 **Supplementary Table 3:** TE insertions across the analysed scaffolds for each of the five species  
437 analysed here, with TE family, superfamily, order and TE insertion site occupancy.

438 **Supplementary Table 4:** TEs showing significant differences in distributions between species and  
439 the median Tajima's D for each species to see if a recent horizontal acquisition was the cause of  
440 this difference. NA is given if the TE family is absent from the species in question.

441 **Supplementary Table 5:** Table of GLM results for differences in IFS between TE families shared  
442 across *D. ananassae*, *melanogaster* and *willistoni* in shared regions of the genome.

443

444 **Figure S1. A.** Insertion frequency spectrum, plots showing the densities of insertions and the  
445 proportion of the population these insertions are found in. These spectra are estimated using  
446 *PopoolationTE2* for each species, separated by TE order. **B.** Insertion frequency spectrum of TE  
447 insertions for regions with high similarity, identified using *progressiveMauve*.

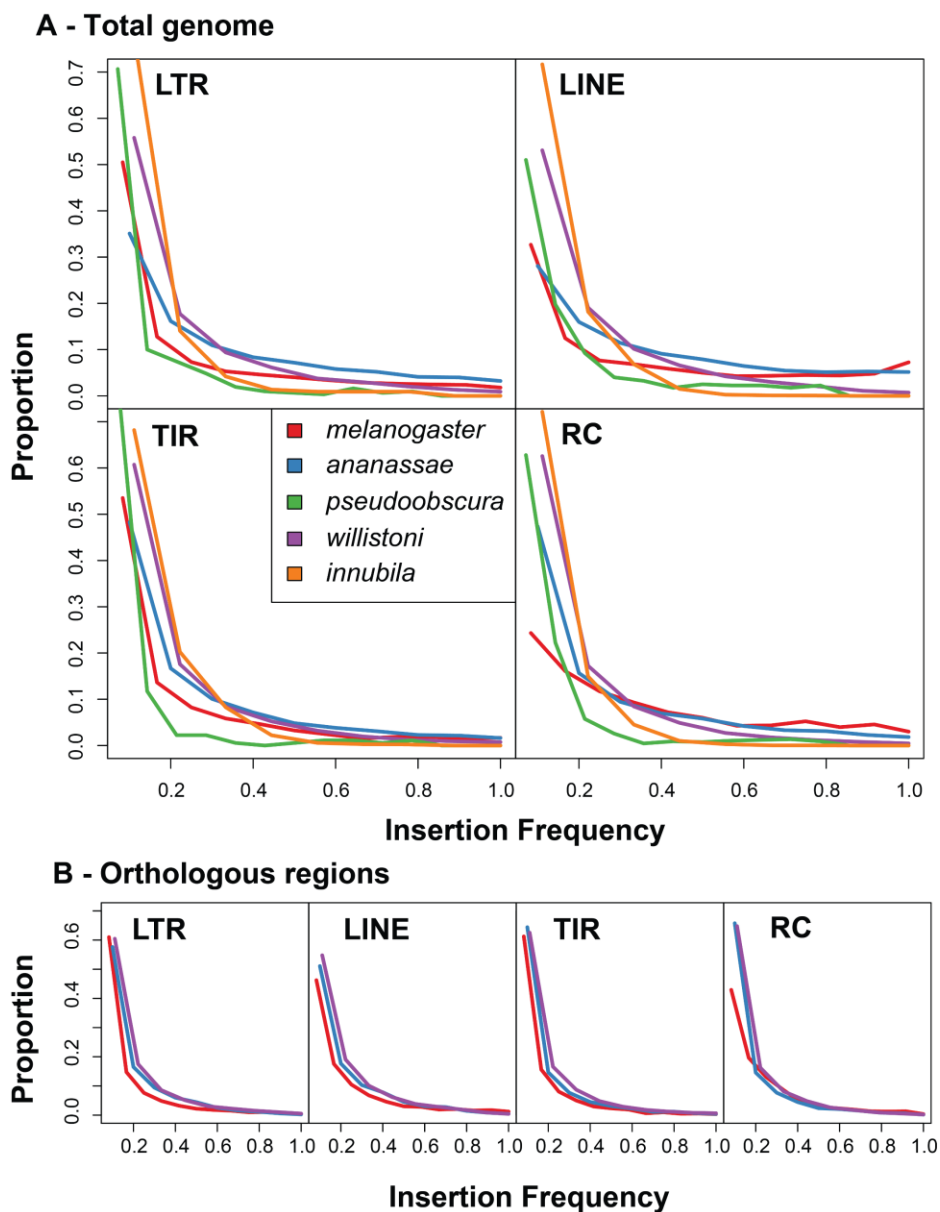

448

449 **Figure S2:** Site frequency spectra the nuclear genome of species analyzed here, calculated using  
450 ANGSD. The theoretical neutral site frequency spectrum is layered on top in red.

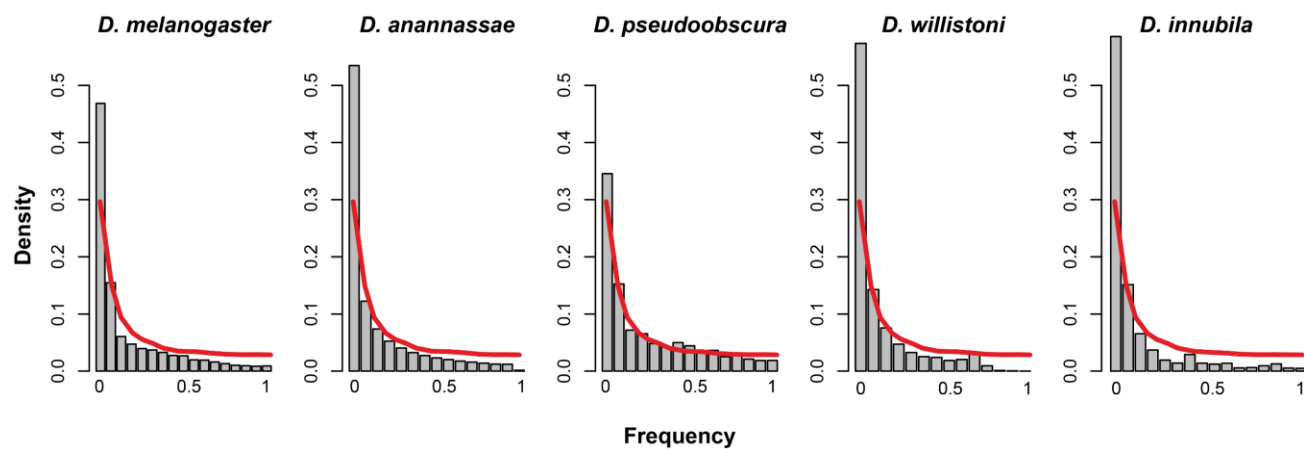

451  
452

453 **Figure S3:** Principle component analysis for nuclear polymorphism for each species.  
454 Subpopulations are colored differently when known. E.G. Muller C inversion karyotype for *D.*  
455 *pseudoobscura* and Arizona sky island place of collection for *D. innubila* (both colored arbitrarily).  
456 Circled clusters are the lines used in the subset analysis, chosen arbitrarily based on the clustering  
457 seen in the PCAs. TE copy number for each species ( $\pm 2$  \* standard deviations) is also compared  
458 to estimated effective population size from *StairwayPlot*.

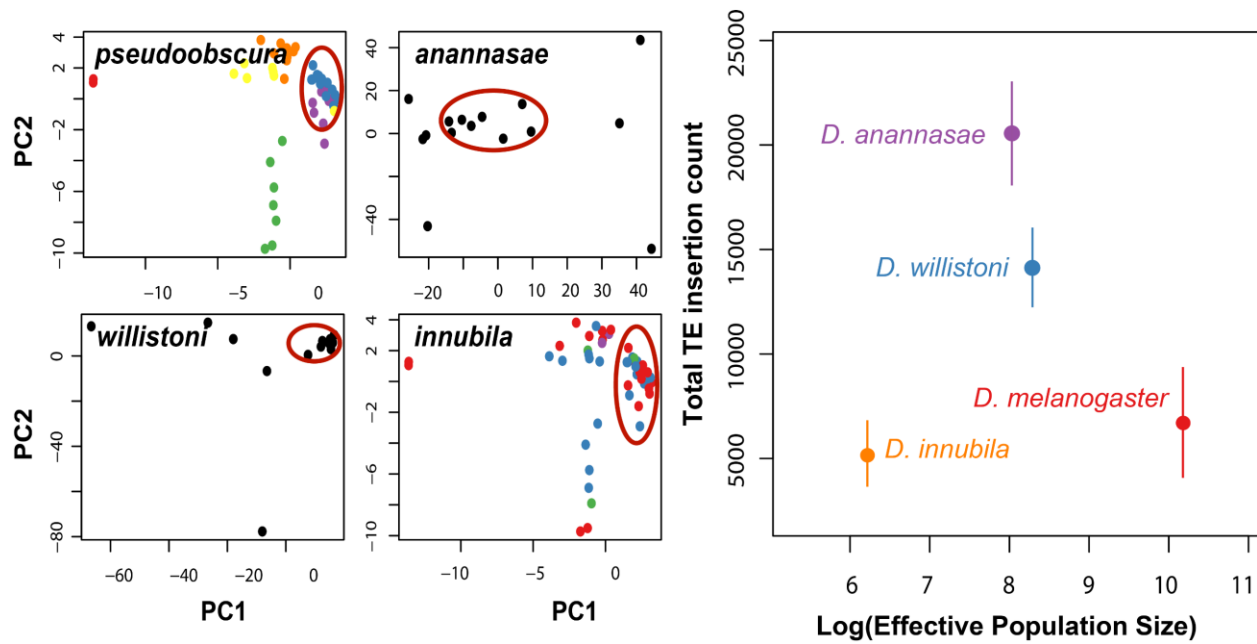

459

460

461 **Figure S4:** Insertion frequency per species for shared TE superfamilies.

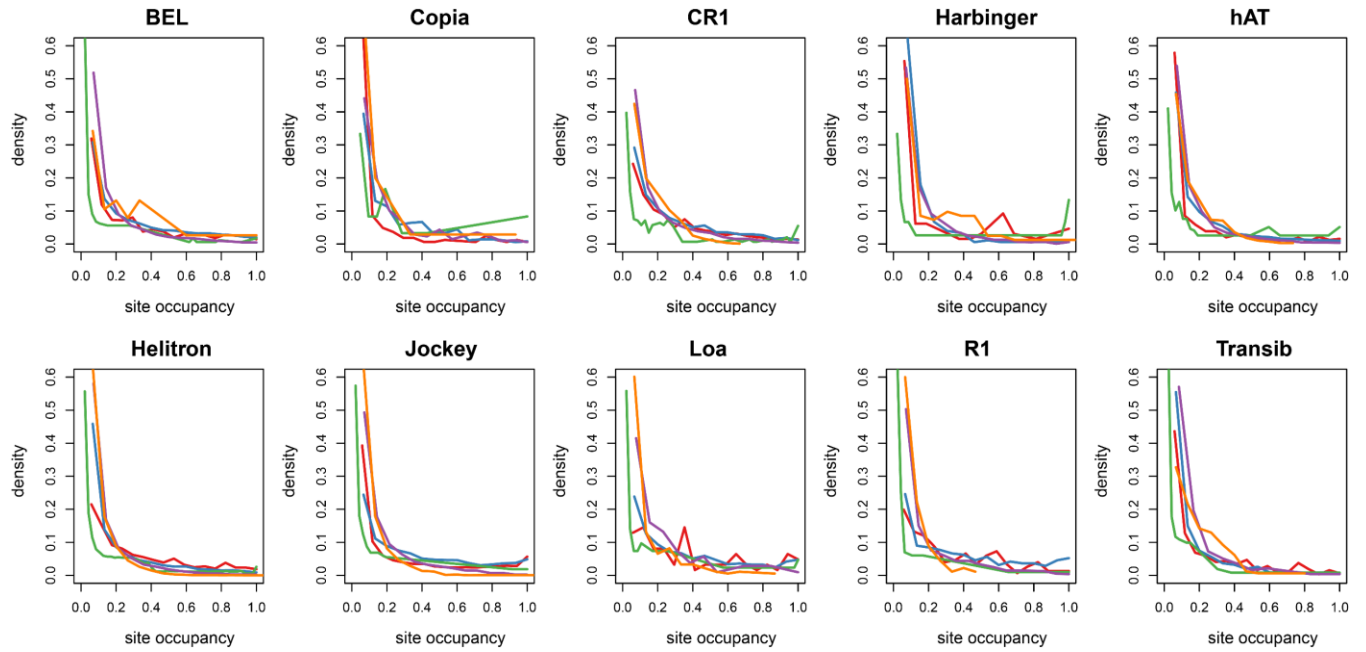

462

463

464 **Figure S5:** Site frequency spectrum of TEs shared between species that are significantly different  
465 in at least one comparison. Spectra are weighted by copy number. These are the 9 of 55  
466 comparisons to show significant differences in distribution between species. The peak at ~60% in  
467 Harbinger-1 in *D. willistoni* is caused by a small number of insertions at 60% frequency and low  
468 insertion numbers found in the *D. willistoni*.

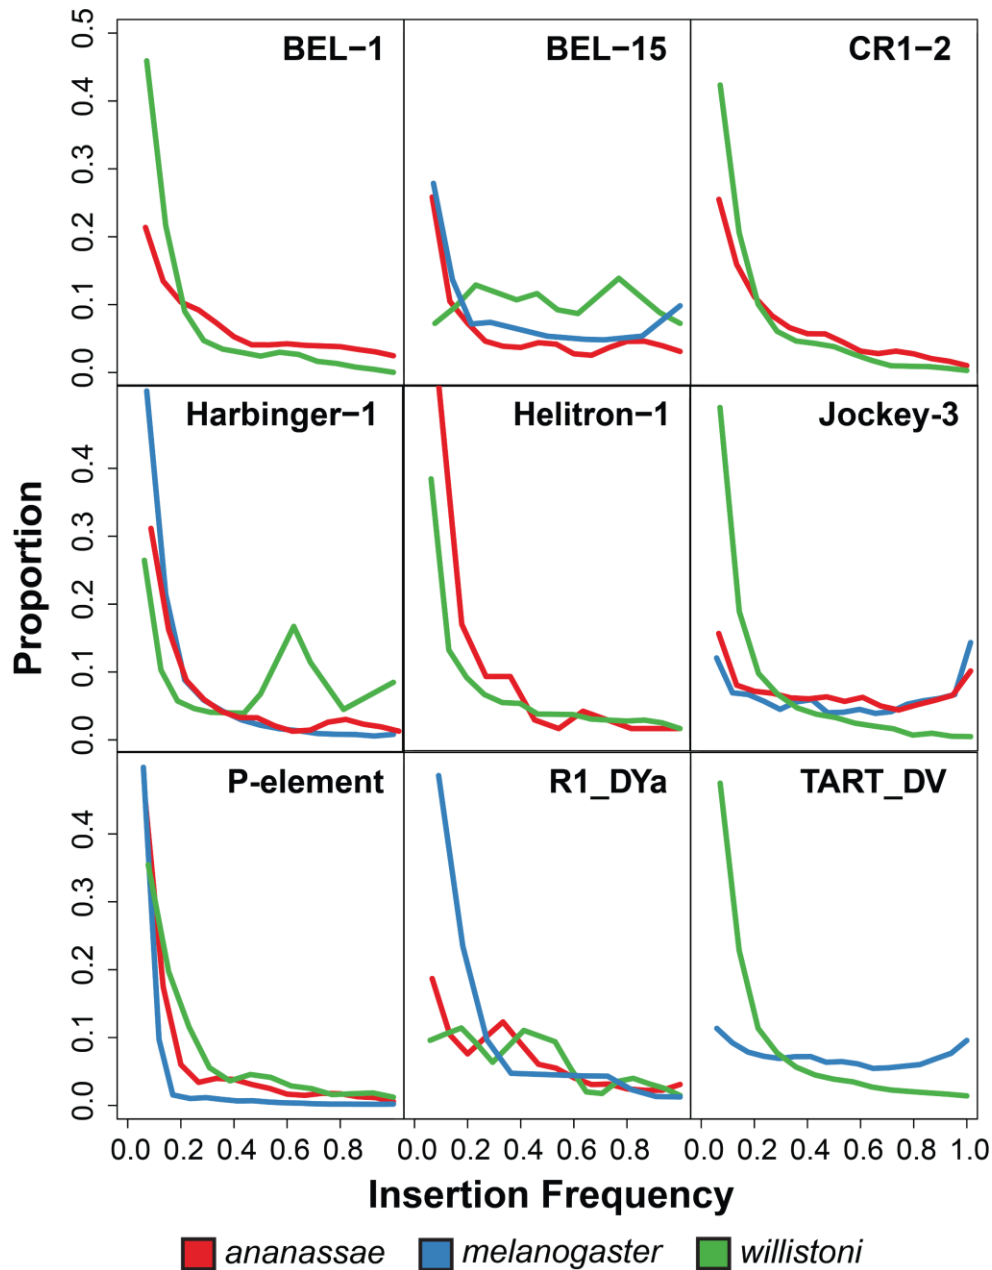

469

470

471 **Bibliography**

- 472 Altschul S. F., W. Gish, W. Miller, E. W. Myers, and D. J. Lipman, 1990 Basic local alignment  
473 search tool. *J. Mol. Biol.* 215: 403–410.
- 474 Aravin A. A., G. J. Hannon, and J. Brennecke, 2007 The piwi-piRNA pathway provides an  
475 adaptive defense in the transposon arms race. *Science* (80-. ). 318: 761–764.
- 476 Bachmann A., and E. Knust, 2008 The use of P-element transposons to generate transgenic flies.  
477 *Methods Mol. Biol.* 420: 61–77.
- 478 Bartolomé C., X. Bello, and X. Maside, 2009 Widespread evidence for horizontal transfer of  
479 transposable elements across *Drosophila* genomes. *Genome Biol.* 10: R22.
- 480 Baym M., S. Kryazhimskiy, T. D. Lieberman, H. Chung, M. M. Desai, *et al.*, 2015 Inexpensive  
481 multiplexed library preparation for megabase-sized genomes. *PLoS One* 1–15.
- 482 Bergman C. M., and D. Bensasson, 2007 Recent LTR retrotransposon insertion contrasts with  
483 waves of non-LTR insertion since speciation in *Drosophila melanogaster*. *Proc. Natl. Acad.*  
484 *Sci. U. S. A.* 104: 11340–11345.
- 485 Blumenstiel J. P., 2011 Evolutionary dynamics of transposable elements in a small RNA world.  
486 *Trends Genet.* 27: 23–31.
- 487 Brennecke J., A. A. Aravin, A. Stark, M. Dus, M. Kellis, *et al.*, 2007 Discrete small RNA-  
488 generating loci as master regulators of transposon activity in *Drosophila*. *Cell* 128: 1089–  
489 1103.
- 490 Brennecke J., C. D. Malone, A. A. Aravin, R. Sachidanandam, A. Stark, *et al.*, 2008 An epigenetic  
491 role for maternally inherited piRNAs in transposon silencing. *Science* 322:
- 492 Buffalo V., 2018 Scythe
- 493 Burt A., and R. Trivers, 2006 *Genes in Conflict*.
- 494 Capy P., T. Langin, D. Higuier, P. Maurer, and C. Bazin, 1997 Do the integrases of LTR-  
495 retrotransposons and class II element transposases have a common ancestor? *Genetica* 100:  
496 63–72.
- 497 Charlesworth B., and C. H. Langley, 1989 The population genetics of *Drosophila* transposable  
498 elements. *Annu. Rev. Genet.* 23: 251–87.
- 499 Charlesworth B., C. H. Langley, and P. D. Sniegowski, 1997 Transposable element distributions  
500 in *Drosophila*. *Genetics* 147: 1993–5.
- 501 Clark A. G., M. B. Eisen, D. R. Smith, C. M. Bergman, B. Oliver, *et al.*, 2007 Evolution of genes



- 502 and genomes on the *Drosophila* phylogeny. *Nature* 450: 203–218.
- 503 Daniels S. B., K. R. Peterson, L. D. Strausbaugh, M. G. Kidwell, and A. Chovnick, 1990 Evidence  
504 for horizontal transmission of the P transposable element between *Drosophila* species.  
505 *Genetics* 124: 339–355.
- 506 Darling A. C. E., B. Mau, F. R. Blattner, and N. T. Perna, 2004 Mauve : Multiple Alignment of  
507 Conserved Genomic Sequence With Rearrangements 1394–1403.
- 508 DePristo M. A., E. Banks, R. Poplin, K. V Garimella, J. R. Maguire, *et al.*, 2011 A framework for  
509 variation discovery and genotyping using next-generation DNA sequencing data. *Nat. Genet.*  
510 43: 491–8.
- 511 Dobzhansky T., and A. H. Sturtevant, 1937 Inversions In Chromosomes of *Drosophila*  
512 *pseudoobscura*. *Genetics* 23: 28–64.
- 513 Dobzhansky T., and C. Epling, 1948 The suppression of crossing over in inversion heterozygotes  
514 of *Drosophila pseudoobscura*. *Proc. Natl. Acad. Sci. U. S. A.* 34: 137–41.
- 515 Fuller Z. L., G. D. Haynes, S. Richards, and S. W. Schaeffer, 2016 Genomics of Natural  
516 Populations: How Differentially Expressed Genes Shape the Evolution of Chromosomal  
517 Inversions in. *Genetics*.
- 518 Gregory T. R., 2005 Synergy between sequence and size in large-scale genomics. *Nat. Rev. Genet.*  
519 6: 699–708.
- 520 Gregory T. R., and J. S. Johnston, 2008 Genome size diversity in the family Drosophilidae.  
521 *Heredity (Edinb)*. 101: 228–38.
- 522 Hellen E. H. B., and J. F. Y. Brookfield, 2013a The diversity of class II transposable elements in  
523 mammalian genomes has arisen from ancestral phylogenetic splits during ancient waves of  
524 proliferation through the genome. *Mol. Biol. Evol.* 30: 100–108.
- 525 Hellen E. H. B., and J. F. Y. Brookfield, 2013b Transposable element invasions. *Mob. Genet.*  
526 *Elements* 3: e23920.
- 527 Hey J., 1989 The transposable portion of the genome of *Drosophila algonquin* is very different  
528 from that in *Drosophila melanogaster*. *Mol. Biol. Evol.* 6: 66–79.
- 529 Hill T., B. Koseva, and R. L. Unckless, 2019 The genome of *Drosophila innubila* reveals lineage-  
530 specific patterns of selection in immune genes. *Mol. Biol. Evol.* in press: 1–29.
- 531 Joshi N., and J. Fass, 2011 Sickle: A sliding window, adaptive, quality-based trimming tool for  
532 fastQ files. 1.33.

- 533 Kaminker J. S., C. M. Bergman, B. Kronmiller, J. Carlson, R. Svirskas, *et al.*, 2002a The  
534 Transposable Elements of the *Drosophila melanogaster* euchromatin: a genomics perspective.  
535 *Genome Biol.* 3: 0084.
- 536 Kaminker J. S., C. M. Bergman, B. Kronmiller, R. Svirskas, S. Patel, *et al.*, 2002b The transposable  
537 elements of the *Drosophila melanogaster* euchromatin : a genomics perspective. *Genome*  
538 *Biol.* 3: 1–20.
- 539 Katoh K., K. Misawa, K. Kuma, and T. Miyata, 2002 MAFFT: a novel method for rapid multiple  
540 sequence alignment based on fast Fourier transform. *Nucleic Acids Res.* 30: 3059–66.
- 541 Khurana J. S., J. Wang, J. Xu, B. S. Koppetsch, T. C. Thomson, *et al.*, 2011 Adaptation to P-  
542 element transposon invasion in *Drosophila melanogaster*. *Cell* 147: 1551–1563.
- 543 Kofler R., P. Orozco-terWengel, N. de Maio, R. V. Pandey, V. Nolte, *et al.*, 2011a Popoolation:  
544 A toolbox for population genetic analysis of next generation sequencing data from pooled  
545 individuals. *PLoS One* 6.
- 546 Kofler R., R. V. Pandey, and C. Schlötterer, 2011b PoPoolation2: Identifying differentiation  
547 between populations using sequencing of pooled DNA samples (Pool-Seq). *Bioinformatics*  
548 27: 3435–3436.
- 549 Kofler R., A. J. Betancourt, and C. Schlötterer, 2012 Sequencing of pooled DNA Samples ( Pool-  
550 Seq ) uncovers complex dynamics of transposable element insertions in *Drosophila*  
551 *melanogaster*. *PloS Genet.* 8: 1–16.
- 552 Kofler R., T. Hill, V. Nolte, A. J. Betancourt, and C. Schlötterer, 2015a The recent invasion of  
553 natural *Drosophila simulans* populations by the P-element. *Proc. Natl. Acad. Sci. U. S. A.*  
554 112.
- 555 Kofler R., V. Nolte, and C. Schlötterer, 2015b Tempo and mode of transposable element activity  
556 in *Drosophila*. *PLoS Genet* 11: e1005406.
- 557 Kofler R., G. Daniel, and C. Schlötterer, 2016 PoPoolationTE2 : comparative population genomics  
558 of transposable elements using Pool-Seq. *Mol. Biol. Evol.* 1–12.
- 559 Kohany O., A. J. Gentles, L. Hankus, and J. Jurka, 2006 Annotation, submission and screening of  
560 repetitive elements in Repbase: RepbaseSubmitter and Censor. *BMC Bioinformatics* 7: 474.
- 561 Korneliussen T. S., A. Albrechtsen, and R. Nielsen, 2014 ANGSD: Analysis of Next Generation  
562 Sequencing Data. *BMC Bioinformatics* 15: 356.
- 563 Langley C. H., E. Montgomery, R. Hudson, N. Kaplan, and B. Charlesworth, 1988 On the role of

564 unequal exchange in the containment of transposable element copy number. *Genet. Res.* 52:  
565 223–235.

566 Lee Y. C. G., and C. H. Langley, 2010 Transposable elements in natural populations of *Drosophila*  
567 *melanogaster*. *Philos. Trans. R. Soc. B Biol. Sci.* 365: 1219–1228.

568 Lee Y. C. G., and C. H. Langley, 2012 Long-term and short-term evolutionary impacts of  
569 transposable elements on *Drosophila*. *Genetics* 192: 1411–1432.

570 Lee Y. C. G., 2015 The role of piRNA-mediated epigenetic silencing in the population dynamics  
571 of transposable elements in *Drosophila melanogaster*. *PLOS Genet.* 11: 1–24.

572 Leung W., and P. Students, 2017 Retrotransposons Are the Major Contributors to the Expansion  
573 of the *Drosophila ananassae* Muller. *G3* 7: 2439–2460.

574 Levine M. T., and H. S. Malik, 2011 Learning to protect your genome on the fly. *Cell* 147: 1440–  
575 1441.

576 Levis R. W., R. Ganesan, K. Houtchens, L. A. Tolar, and F. Sheen, 1993 Transposons in place of  
577 telomeric repeats at a *Drosophila* telomere. *Cell* 75: 1083–1093.

578 Li H., and R. Durbin, 2009 Fast and accurate short read alignment with Burrows-Wheeler  
579 transform. *Bioinformatics* 25: 1754–60.

580 Li H., B. Handsaker, A. Wysoker, T. Fennell, J. Ruan, *et al.*, 2009 The sequence alignment/map  
581 format and SAMtools. *Bioinformatics* 25: 2078–9.

582 Linheiro R. S., and C. M. Bergman, 2012 Whole genome resequencing reveals natural target site  
583 preferences of transposable elements in *Drosophila melanogaster*. *PLoS One* 7: e30008.

584 Lisch D., and J. L. Bennetzen, 2011 Transposable element origins of epigenetic gene regulation.  
585 *Curr. Opin. Plant Biol.* 14: 156–161.

586 Liu X., and Y.-X. Fu, 2015 Exploring population size changes using SNP frequency spectra. *Nat.*  
587 *Genet.* 47: 555–559.

588 Lu J., and A. G. Clark, 2010 Population dynamics of PIWI-interacting RNAs ( piRNAs ) and their  
589 targets in *Drosophila*. *Genome Res.* 20: 212–227.

590 Markow T. A., and P. O’Grady, 2006 *Drosophila: a guide to species identification*.

591 McClintock B., 1953 Induction of instability at selected loci in Maize. *Genetics* 38: 579–599.

592 McGaugh S. E., C. S. S. Heil, B. Manzano-Winkler, L. Loewe, S. Goldstein, *et al.*, 2012  
593 Recombination modulates how selection affects linked sites in *Drosophila*. *PLoS Biol.* 10:  
594 1–17.

- 595 Montgomery E. A., S. Huang, C. H. Langley, and B. H. Judd, 1991 Chromosome rearrangement  
596 by ectopic recombination in *Drosophila melanogaster*: genome structure and evolution.  
597 *Genetics* 129: 1085–1098.
- 598 Nanda S., G. Jayan, F. Voulgaropoulou, A. M. Sierra-Honigmann, C. Uhlenhaut, *et al.*, 2008  
599 Universal virus detection by degenerate-oligonucleotide primed polymerase chain reaction of  
600 purified viral nucleic acids. *J. Virol. Methods* 152: 18–24.
- 601 Obbard D. J., K. H. J. Gordon, A. H. Buck, and F. M. Jiggins, 2009 The evolution of RNAi as a  
602 defence against viruses and transposable elements. *Philos. Trans. R. Soc. Lond. B. Biol. Sci.*  
603 364: 99–115.
- 604 Orgel L. E., and F. H. C. Crick, 1980 Selfish DNA: the ultimate parasite. *Nature* 284: 604–607.
- 605 Palmieri N., C. Kosiol, and C. Schlötterer, 2014 The life cycle of *Drosophila* orphan genes. *Elife*  
606 3: 1–21.
- 607 Pardue M.-L., and P.G. DeBaryshe, 2003 Retrotransposons provide an evolutionarily robust non-  
608 telomerase mechanism to maintain telomeres. *Annu. Rev. Genet.* 37: 485–511.
- 609 Pasyukova E. G., S. V Nuzhdin, T. V Morozova, and T. F. C. Mackay, 2004 Accumulation of  
610 transposable elements in the genome of *Drosophila melanogaster* is associated with a  
611 decrease in fitness. *J. Hered.* 95: 284–90.
- 612 Petrov D. A., Y. T. Aminetzach, J. C. Davis, D. Bensasson, and A. E. Hirsh, 2003 Size matters:  
613 Non-LTR retrotransposable elements and ectopic recombination in *Drosophila*. *Mol. Biol.*  
614 *Evol.* 20: 880–892.
- 615 Petrov D. a, A.-S. Fiston-Lavier, M. Lipatov, K. Lenkov, and J. González, 2011 Population  
616 genomics of transposable elements in *Drosophila melanogaster*. *Mol. Biol. Evol.* 28: 1633–  
617 1644.
- 618 Quinlan A. R., and I. M. Hall, 2010 BEDTools: a flexible suite of utilities for comparing genomic  
619 features. *Bioinformatics* 26: 841–2.
- 620 Rahman R., G.-W. Chirn, A. Kanodia, Y. A. Sytnikova, B. Brembs, *et al.*, 2015 Unique transposon  
621 landscapes are pervasive across *Drosophila melanogaster* genomes. *Nucleic Acids Res.* 43:  
622 10655–72.
- 623 Senti K. A., and J. Brennecke, 2010 The piRNA pathway: A fly’s perspective on the guardian of  
624 the genome. *Trends Genet.* 26: 499–509.
- 625 Senti K. A., D. Jurczak, R. Sachidanandam, and J. Brennecke, 2015 piRNA-guided slicing of

626 transposon transcripts enforces their transcriptional silencing via specifying the nuclear  
627 piRNA repertoire. *Genes Dev.* 29: 1747–1762.

628 Sessegolo C., N. Bulet, A. Haudry, C. Biéumont, C. Vieira, *et al.*, 2016 Strong phylogenetic inertia  
629 on genome size and transposable element content among 26 species of flies. *Biol. Lett.* 12:  
630 521–524.

631 Smit A. F. A., and R. Hubley, 2008 RepeatModeler Open-1.0

632 Sniegowski P. D., and B. Charlesworth, 1994 Transposable element numbers in cosmopolitan  
633 inversions from a natural population of *Drosophila melanogaster*. *Genetics* 137: 815–827.

634 Tajima F., 1989 Statistical method for testing the neutral mutation hypothesis by DNA  
635 polymorphism. *Genetics* 123: 585–595.

636 Tarailo-Graovac M., and N. Chen, 2009 Using RepeatMasker to identify repetitive elements in  
637 genomic sequences. *Curr. Protoc. Bioinforma.*

638 Team R. C., 2013 R: A Language and Environment for Statistical Computing

639 Wicker T., F. Sabot, A. Hua-Van, J. L. Bennetzen, P. Capy, *et al.*, 2007 A unified classification  
640 system for eukaryotic transposable elements. *Nat. Rev. Genet.* 8: 973–82.

641
