## **Transposable element dynamics are consistent across the *Drosophila* phylogeny, despite drastically differing content**

Tom Hill<sup>1\*</sup>

1. 4012 Haworth Hall, The Department of Molecular Biosciences, University of Kansas, 1200 Sunnyside Avenue, Lawrence, KS 66045. Email: tom.hill@ku.edu

\* Corresponding author

**Keywords:** Transposable elements, *Drosophila*, fitness.

## 1 **Abstract**

2 **Background:** The evolutionary dynamics of transposable elements (TEs) vary across the tree of  
3 life and even between closely related species with similar ecologies. In *Drosophila*, most of the  
4 focus on TE dynamics has been completed in *Drosophila melanogaster* and the overall pattern  
5 indicates that TEs show an excess of low frequency insertions, consistent with their frequent turn  
6 over and high fitness cost in the genome. Outside of *D. melanogaster*, insertions in the species  
7 *Drosophila algonquin*, suggests that this situation may not be universal, even within *Drosophila*.  
8 Here we test whether the pattern observed in *D. melanogaster* is similar across five *Drosophila*  
9 species that share a common ancestor more than fifty million years ago.

10 **Results:** For the most part, TE family and order insertion frequency patterns are broadly conserved  
11 between species, supporting the idea that TEs have invaded species recently, are mostly costly and  
12 dynamics are conserved in orthologous regions of the host genome

13 **Conclusions:** Most TEs retain similar activities and fitness costs across the *Drosophila* phylogeny,  
14 suggesting little evidence of drift in the dynamics of TEs across the phylogeny, and that most TEs  
15 have invaded species recently.

16

## 17 **Introduction**

18 Transposable elements are selfish mobile genetic elements found throughout the genomes  
19 of most living organisms; these sequences copy and move throughout hosts genomes, mostly to  
20 the detriment of the host [1-5]. Mammalian genomes are rarely invaded by TEs, and therefore have  
21 few active transposable elements (TEs), a large proportion of their genomes are composed of TE  
22 insertions fixed within a species population [6-8]. Comparatively, TEs in the fruit fly *Drosophila*  
23 appear to be highly active, resulting in polymorphic insertions for most TE families within a  
24 species population, with a lower proportion of their genome comprised of TEs [3, 9].

25 These differences can be explained with a model described by Lee and Langley [10]. TEs  
26 have bursts of activity recently after invading a genome, resulting in their transposition, their  
27 insertions are primarily deleterious to the host; they can interrupt a gene, cause aberrant expression  
28 or differential exon expression [3, 4, 9, 11]. Without regulation, TEs are also rampantly expressed  
29 and transposing, at a high cost to the host [10, 12]. To combat this, TE activity is suppressed, in  
30 the case of most animals, via the piRNA system [13-16]. Using small RNAs transcribed from TE

31 sequences, the piRNA system targets and degrades complementary TE mRNAs and cause  
32 heterochromatin formation on similar TE insertions [12, 17-19]. However, the piRNA system can  
33 cause the propagation of heterochromatic silencing marks around TE insertions, resulting in the  
34 silencing of nearby genes and position effect variegation [10, 19]. This deleterious side effect, in  
35 combination with the deleterious effects of TE insertions suggests TE insertions should be rare in  
36 euchromatic regions [3, 9, 10, 20].

37 Within this model, TEs will enter a genome and spread rapidly through a burst of  
38 unsuppressed transposition [21-23]. The TE will be silenced via the piRNA system and regulated  
39 so long as piRNAs are produced against the TE [12, 24]. Following this, a TE will decrease in  
40 activity and will have an insertion frequency spectra (IFS) changing from an excess of rare  
41 insertions to fewer, more common insertions, likely in heterochromatic regions and piRNA  
42 clusters [11, 13], as the TE ages [22]. From this, we expect larger genomes with fewer active TEs,  
43 such as mammals, to have higher TE abundances and TE insertion frequency spectra showing no  
44 skew towards rare insertions as TE insertions are on average, less costly as genes make up a smaller  
45 portion of the genome, and less likely to have bursts of activity (Figure 1). While species with  
46 higher effective population sizes, higher coding densities and more active (more recently invaded)  
47 TEs, such as *Drosophila melanogaster*, should have lower abundances of TEs and IFS skewed to  
48 rare insertions [10, 11, 21, 22, 25].

49  
50 However, the expectation of lower euchromatic TE abundances, consistent with higher  
51 coding densities seen in *Drosophila melanogaster* is not seen in all *Drosophila* species [23]. The  
52 dynamic nature of *Drosophila* TEs can be clearly seen in the 12-genomes project, a group of 12  
53 sequenced *Drosophila* species genomes, that span the ~50 million year *Drosophila* genus, with  
54 species in both the *Drosophila* and *Sophophora* sister subgenera [26, 27]. The sequenced species  
55 show striking differences between TE families and orders, and make up differing proportions of  
56 the genome, between 5 and 40% across the tree [28]. Furthermore, two studies comparing *D.*  
57 *melanogaster* and *D. simulans* TE content find a divergence in activity between genomes,  
58 specifically finding higher TE content in *D. melanogaster*, an relatively more intermediate  
59 frequency insertions in *D. simulans*, and an relatively more fixed and low frequency insertions in  
60 *D. melanogaster* [22, 29, 30]. These studies support the idea that even the same families shared  
61 between closely related species can diverge in activity and insertion frequency over time, and that

62 differences may be even more extremely between more diverged species [22, 29]. Finally, the TE  
63 content of two species in the *D. affinis* subgroup, is not comprised of lower copy number families  
64 with an excess of low frequency insertions [31]. Instead they have a few, highly abundant families,  
65 with many high frequency insertions, like mammalian genomes, despite their small genome and  
66 large effective population sizes [32, 33]. This could be as these species lack any TEs that have  
67 recently invaded the genome and therefore have bursts of activity within the genome [22]. Though  
68 the methods used in this study are not truly comparable to modern techniques of assessing TE  
69 abundances, together with the diversity of abundances in the 12 genomes it brings into question  
70 the extent to which the previously described model fits outside the *D. melanogaster*, and where  
71 within the frame work other species fit [23, 31].

72 Here, we use next generation sequencing data and modern TE content identification  
73 methods to assess the TE insertion densities and TE insertion frequency spectra of the euchromatic  
74 genome of five *Drosophila* species. We attempt to identify if TEs show patterns consistent with  
75 highly active TE families across species, suggested by insertions being rare and primarily  
76 deleterious and differ in their ages within species. Additionally, we examine the extent that TE  
77 insertion frequency patterns differ between species with differing abundances of TEs. We find that  
78 despite differences in TE abundances and euchromatic insertion densities between species, most  
79 TE insertions have an IFS consistent with families recently invading genomes, highly active and  
80 deleterious in all species, though some individual families differ in their insertion frequencies  
81 between species (Figure 1 and 3). This suggests that TEs remain consistently deleterious across  
82 the *Drosophila* phylogeny, despite strong phylogenetic differences between species, and large  
83 changes in effective population size and TE densities [28].

84

## 85 **Results**

### 86 **TE content differs drastically across the species examined**

87 To examine the abundance and fitness cost of TE insertions across our *Drosophila* phylogeny of  
88 five species (Figure 1, 2A), we sequenced 20 wild caught *Drosophila innubila* individuals  
89 (described in the materials and methods) and downloaded short-read data for 17 *D. melanogaster*  
90 genomes, 45 *D. pseudoobscura* Muller C's, 16 *D. annanassae* genomes and 14 *D. willistoni*  
91 genomes. We then generated profiles of the TE content of each individuals in each species using  
92 a combination of *RepeatMasker*, *BEDTools* and *PopoolationTE2* (Tarailo-Graovac and Chen

93 2009; Quinlan and Hall 2010; Kofler *et al.* 2011b) [34-38] using either a repeat library generated  
94 from RepBase TE sequences (Data S1), or a custom repeat library for *D. innubila*, generated by  
95 RepeatModeler [39, 40]. We estimated the proportion of each genome made up of TE insertions,  
96 the median copy number of each TE family and the median insertion number of each family in the  
97 euchromatic portion of the genome. We grouped families by their orders, either terminal inverted  
98 repeat (TIR) and rolling circle (RC) DNA transposons, or long terminal repeat (LTR) and long  
99 interspersed nuclear elements (LINE) RNA retrotransposons [5, 41] (TE hierarchy in Data S2).  
100 Within each species, the TE content varies drastically – between 15% and 40% of each genome  
101 (Figure 2B), with consistently different numbers of TE copies and euchromatic insertions between  
102 species (Figure 2B). As identified elsewhere, there is a significant association between genome  
103 size and TE content (Table S2,  $p$ -value = 0.002) [5, 8, 42].

104 The recently assembled and annotated genome of *D. innubila* has considerably lower  
105 insertion count numbers, perhaps due to the inferior annotation of TE content compared to other  
106 species. Interestingly, the *D. innubila* genome appears to have a lower amount of LTRs than most  
107 other studied *Drosophila* species [39], showing a similar profile to the relatively closely related *D.*  
108 *mojavensis* [28]. Most other species have retrotransposons, such as LTRs and LINEs, making up  
109 a large proportion of their repeat content (Figure 2B) [23]. As shown previously, *D. ananassae*  
110 and *D. willistoni* have much higher TE content than the other species analyzed here [23, 28]. These  
111 species differ in genome size, including an expanded Muller Element F in *D. ananassae* [23, 43].  
112 In fact, there is an excess of TE content in *D. ananassae* on Muller element F. This Muller element  
113 represents only ~11.6% of the assembled reference genome (based on *D. melanogaster* orthology)  
114 but contains ~21.1% of the reference genomes TE content (based on *RepeatMasker* estimates),  
115 and so may account for the differences seen here.

116 To control for this Muller element expansion and other differences in genome size, we  
117 measured the TE insertion density per autosomal euchromatic megabase and found a significant  
118 excess of TE insertions per MB in *D. ananassae* and *D. willistoni* versus all other species, in all  
119 TE orders (Figure 2C, quasi-Poisson GLM,  $z$ -value > 19.296,  $p$ -value < 0.0006). These differences  
120 in TE abundances suggest that TE insertions may have differing dynamics between species, even  
121 when excluding TE rich regions. Due to the larger genomes and more abundant TE insertions,  
122 insertions may be less costly in *D. ananassae* and *D. willistoni* compared to other species and so  
123 may be more common in populations, with IFS skewed towards higher frequencies [12, 15, 44].

124

## 125 **TE insertions are primarily rare across the *Drosophila* phylogeny**

126 Using the TE insertions called with *PopoolationTE2*, we found the insertion frequency spectrum  
127 (IFS) across each TE order, across all species, limited to the autosomes (Kofler *et al.* 2016). Like  
128 the differing TE insertion numbers and densities across species (Figure 2), the IFS also differ  
129 (Figure S1, Table S2 and S3). Comparing IFSs between TE orders, we find a significant excess of  
130 high frequency RC insertions in *D. melanogaster* versus other species (GLM quasi-Binomial  $p$ -  
131 value  $< 3.5e-5$ ,  $t$ -value  $> 4.151$ ). We also find an excess of rare (low frequency) TIR insertions  
132 versus other species in *D. innubila* ( $p$ -value =  $2.37e-5$ ,  $t$ -value =  $-4.24$ ) and *D. pseudoobscura* ( $p$ -  
133 value =  $5.74e-15$ ,  $t$ -value =  $-7.891$ ). Additionally, we find a significant excess of high frequency  
134 LTR insertions in *D. ananassae* versus all other species (GLM  $p$ -value  $< 2e-16$ ,  $t$ -value =  $13.243$ )  
135 and an excess of higher frequency LINE insertions in both *D. melanogaster* (GLM  $p$ -value  $< 2e$ -  
136  $16$ ,  $t = 12.526$ ) and *D. ananassae* (GLM  $p$ -value  $< 2e-16$ ,  $t$ -value =  $11.505$ ). While we find IFS  
137 differ between species, in all cases TEs are skewed towards rare insertions (Figure 1). The median  
138 insertion frequency is below 25% in every TE order across all species and shows no significant  
139 differences between species (Table S2 and S3, GLM  $p$ -value  $> 0.213$ ).

140 As these comparisons may be biased by factors such as how the data was generated, the  
141 sequencing methods, the quality of the reference genomes and the TE annotation, we limited our  
142 analysis to *D. melanogaster*, *D. ananassae* and *D. willistoni*, three species with data generated in  
143 similar manners, with similar TE families and high-quality reference genomes. We assessed only  
144 insertions in regions of the autosomal genome identified as orthologous using *progressiveMauve*  
145 [45]. When comparing the insertions in these orthologous regions, for all comparisons we find the  
146 TE dynamics are more consistent between species, with no significant differences in any  
147 comparison (Table S2, Figure 3, Figure S1B: GLM  $p$ -value  $> 0.21$ ,  $t$ -value  $< 1.556$ ).

148

## 149 **TE site frequency spectra rarely differ when accounting for population structure, insertions 150 are primarily rare**

151 One limitation of the analysis thus far is that all samples except *D. melanogaster* violate our  
152 implicit assumption of a single, panmictic population, which may skew the IFS to higher  
153 frequencies. This is can be seen in differences in estimated nucleotide site frequency spectrum of  
154 each species (limited to Muller element C for *D. pseudoobscura*) [46, 47], specifically finding an

155 excess of high frequency variants in *D. pseudoobscura* when compared to *D. melanogaster* and an  
156 excess of low frequency variants in *D. willistoni* and *D. innubila* when compared to *D.*  
157 *melanogaster* (Figure S2, GLM quasi-Binomial  $p$ -value  $< 0.05$ ). As expected, all site frequency  
158 spectra (SFS) show an excess of rare variants consistent with purifying selection, however *D.*  
159 *pseudoobscura* almost fits the neutral expectation, possibly due to the structured populations  
160 expected with the segregating inversions found on Muller element C [47-50].

161 To combat this, we clustered lines based on nuclear polymorphism using a principle  
162 component analysis (Figure S3). We then took a subset of lines for each species which appear to  
163 cluster as a single group in a principle component analysis (Figure S3). We also attempted to  
164 account for effective population size, on TE content, we find no association between effective  
165 population size and total TE content or insertion density, so did not control for this further (LM  $p$ -  
166 value  $> 0.05$ , Figure S3). This result contrasts with previous work which finds a negative  
167 association between effective population size and repetitive content [42, 51], possibly due to half  
168 of our species (*D. ananassae* and *D. willistoni*) as known exceptions for *Drosophila* TE content  
169 [23, 43]. Additionally, our sample size may be too small, and species too closely related to draw  
170 any strong conclusions about the relationship between repetitive content, genome size and  
171 effective population size in *Drosophila*.

172 In selected subpopulations, we examined the nuclear SFS between species and, with no  
173 drastic differences seen, we compared IFS between species. We find similar IFS across TE orders,  
174 though we do find an excess of high frequency RC insertions in *D. melanogaster* and an excess of  
175 high frequency LTR and LINE insertions in *D. ananassae* (Figure 3A, GLM  $p$ -value =  $2e-16$ ). As  
176 few RC insertions are found in *D. melanogaster* compared to other species, their genome has likely  
177 not been invaded by RC families recently, with their decreasing activity and increase in insertion  
178 frequency over time, while more recent invading RC families are found in other species are highly  
179 active with an excess of low frequency insertions [5, 22]. Again, we find no significant differences  
180 when comparing orthologous regions (GLM  $p$ -value  $> 0.05$ ). As orthologous regions are  
181 exclusively in the euchromatic portion of the genomes, looking in orthologous regions removes  
182 heterochromatic insertions which are more likely to be high frequency [13]. As previous, most TE  
183 insertions are rare in all species (median frequency  $< 20\%$ ), with *D. ananassae* and *D.*  
184 *melanogaster* having the highest median frequency insertion, we also find no significant difference



185 between median insertion frequency for any species or TE order (GLM  $p$ -value  $> 0.352$ ) and no  
186 association between TE density or genome size with median insertion frequency ( $p$ -value  $> 0.05$ ).

187

188 **Only a few, highly active, families differ across species, consistent with differing times of**  
189 **invasion**

190 Our broader comparisons fit with previous work, that finds most TE families are highly active  
191 across a range of species due to recent spread of these TEs [22, 25]. As these broad observations  
192 may homogenize large differences between TE families, we chose to focus our analysis on specific  
193 families, shared between species.

194 We repeated the previous analysis across 10 TE super families found in all species [5, 23].  
195 While there is a noticeable excess of low frequency insertions in *D. pseudoobscura*, we found no  
196 significant difference of insertion frequency between species for TE super family frequency (GLM  
197 logistic regression:  $-1.351 < t\text{-value} < -0.092$ ,  $p\text{-value} > 0.183$ ), however this may be due to few  
198 TE insertions in each subgroup or could again be too broad for any real inference (Figure S4).

199 Thus, we attempted to compare the dynamics of specific families shared between *D.*  
200 *melanogaster*, *D. ananassae* and *D. willistoni*. We identified 55 families shared between these  
201 species and extracted insertions for each family within the previously identified orthologous  
202 regions. For each TE family we compared the insertion frequency spectra for each species. Only  
203 eight of the 55 TE families showing any significant differences in IFS (six after multiple testing  
204 correction, Table S3-5, Figure S5, GLM logistic regression:  $p\text{-value} < 0.05$ ). For these elements,  
205 one species has an excess of low frequency variants compared to the other two species (Figure  
206 S5), suggesting this difference may be due to a more recent acquisition in this species, resulting in  
207 higher activity, or more bursts of activity, rather than a consistent difference in activity between  
208 species, similar to the findings in comparisons across *D. melanogaster* group populations [22, 25,  
209 52, 53].

210 To test if these elements more recently invaded the species showing a difference in  
211 dynamics, we calculated Tajima's D for each of the shared 55 TE families. A negative Tajima's D  
212 suggests an excess of low frequency variants, consistent with an expansion in copy number  
213 following a bottleneck, as would happen with a recent horizontal invasion [54, 55]. Among the 55  
214 shared families, we find ten TE families have significant differences in estimations of Tajima's D  
215 between species (GLM  $p$ -value  $< 0.05$ ). Only one of the eight TE families with a differing IFS,



216 has a significantly negative Tajima's D, the *P*-element [30]. *P*-element has a significantly different  
217 insertion frequency spectrum between species (GLM logistic regression: *p*-value < 0.05), and  
218 significantly lower Tajima's D (GLM *p*-value < 0.05), due to its recent horizontal transfer to *D.*  
219 *melanogaster* from *D. willistoni* [56-58]. Overall these results suggest few TE families differ  
220 between species in activity, after accounting for recent acquisitions.

221

## 222 **Discussion**

223 Transposable elements, as mobile parasitic elements, are mostly costly to a host organism [3, 9,  
224 20, 59], due to their rampant transposition, leading to the disruption of coding sequences [3, 9, 12,  
225 20, 60], the mis regulation of gene expression [1, 2, 19, 61, 62] and even because of ectopic  
226 recombination and chromosomal breakage between two copies of the same TE family [3, 20, 63,  
227 64]. Deleterious insertions are removed under purifying selection and TE families are rapidly  
228 silenced upon their acquisition [3, 11, 20, 64], giving an expectation for an insertion frequency  
229 spectrum skewed towards low frequency insertions for more recently acquired families that are  
230 highly active [3, 9, 20, 64, 65]. Most of the theoretical and experimental work that led to our  
231 understanding of TE dynamics has been completed in *D. melanogaster* [3, 20, 64, 66], under the  
232 assumption that TEs in other *Drosophila* and insects behave in a similar manner, despite some  
233 evidence to the contrary [31, 67, 68]. Here we test the validity of this assumption by assessing the  
234 TE dynamics in a *D. melanogaster* population and populations of four other *Drosophila* species.  
235 Despite drastic differences in TE content and densities between the species (Figure 2), we observe  
236 a pattern of rare insertions across all species, consistent with a recent invasion of highly active TE  
237 families, with insertions under strong purifying selection in all species (Figure 3, Figure S1, Table  
238 S2 and S4).

239 There are several possible explanations for the fact that work predating next generation  
240 sequencing technologies suggested differences in TE dynamics among species [31]. First, these  
241 differences may be due to host-specific factors (Table S2 - 4, Figure S1 and S4), such as how recent  
242 the TE families have invaded a species genome (Hey 1989; Kaminker *et al.* 2002b). However,  
243 most families found in *D. affinis* are shared across the *D. obscura* group or with other *Drosophila*  
244 [69], suggesting TEs are being transferred between species. Second, high copy number families  
245 identified by *In Situ* hybridisation may have be low resolution conflating separate insertions as the  
246 same insertion, artificially inflating that insertion's frequency and skewing its frequency higher

247 than in lower copy number samples [31]. Finally, species genomes may differ in their chromatin  
248 states at different parts of genomes, limiting our analyses to well described euchromatic portions  
249 could stunt our ability to identify the diversity of TE dynamics in these host species. *D. ananassae*,  
250 for example, has an expansive Muller element F [43], full of transposable elements that was not  
251 included in this survey (due to most the chromosome being masked in the reference genome).

252 Overall, our results support a model where TE families invade genomes, expand in copy  
253 number, are rapidly regulated by the host genome (to differing levels among species), with  
254 insertions primarily being deleterious in all species examined, though the selection against  
255 insertions appears to differ from species to species to a minor degree.

256

## 257 **Materials and Methods**

### 258 **Population genomic data**

259 We used next generation sequencing data from five species collected from three sources,  
260 summarized in Table S1. For *Drosophila melanogaster*, we downloaded the FastQ files of 100bp  
261 paired end reads for a randomly selected set of 17 lines of the DPGP from a population collected  
262 from Zambia (SRA accessions: SRR203500-10, SRR204006-12). Similarly, we downloaded the  
263 FastQ files of 100bp paired end reads for 45 *Drosophila pseudoobscura* lines (SRA accessions:  
264 SRR617430-74) [47]. These lines consist of wild flies crossed to balancer stocks for chromosome  
265 3 (Muller element C), this results in an isolated wild third chromosome, but a mosaic of balancer  
266 and wild stocks across the remainder of the genome, due to this we restricted our analysis to Muller  
267 element C (chromosome 3) in these lines.

268 We obtained sequencing information for 16 *Drosophila ananassae* isofemale lines and 14  
269 *willistoni* isofemale lines. These lines were sequenced using an illumina HiSeq 2500 to produce  
270 100bp paired end reads for each isofemale line.

271 Wild *Drosophila innubila* were captured at the Southwest Research Station in the  
272 Chiricahua Mountains between September 8<sup>th</sup> and 15<sup>th</sup>, 2016. Baits consisted of store-bought  
273 white button mushrooms (*Agaricus bisporus*) placed in large piles about 30cm in diameter. A  
274 sweep net was used to collect the flies over the baits. Flies were sorted by sex and species at the  
275 University of Arizona and males were frozen at -80 degrees C before being shipped on dry ice to  
276 Lawrence, KS. All *D. innubila* males were homogenized in 50 microliters of viral buffer (a media  
277 meant to preserve viral particles, taken from [70]) and half of the homogenate was used to extract

278 DNA using the Qiagen Genra Puregene Tissue kit (#158689, Germantown, Maryland, USA). We  
279 constructed a genomic DNA library using a modified version of the Nextera DNA Library Prep  
280 kit (#FC-121-1031, Illumina, Inc., San Diego, CA, USA) meant to conserve reagents [71]. We  
281 sequenced 20 male samples as a library on two lanes of an Illumina HiSeq 2500 System Rapid-  
282 Run to generate paired-end 150 base-pair reads (available at NCBI accession numbers  
283 SRR6033015 [72]).

284 We trimmed all data using *Sickle* (minimum length = 50, minimum quality = 20) before  
285 mapping, and removed adapter sequences using *Scythe* [73, 74].

### 286 **Custom reference genomes**

287 We downloaded the latest *Flybase* reference genome (Flybase.org, as of December 2018) for *D.*  
288 *melanogaster*, *D. ananassae*, *D. pseudoobscura* and *D. willistoni*, and used the *D. innubila*  
289 reference genome available on NCBI (NCBI accession: SKCT000000000) [39, 75, 76].

290 For the released genomes (*D. melanogaster*, *D. ananassae*, *D. pseudoobscura* and *D.*  
291 *willistoni*), we identified and masked each reference genome using *RepeatMasker* (parameters: -  
292 pa 4 -s -gff -gccalc -nolow -norna -no\_is) [36, 37], using a custom repeat library, consisting of  
293 *Repbase* TE sequences previously identified in each of the species examined here [77].

294 For *D. innubila*, we generated a repeat library for the reference genome using  
295 *RepeatModeler* (parameters: - engine NCBI) [40]. Then, after identifying each family order by  
296 NCBI universal *BLAST* [78], used this library as the custom TE library for repeat masking as  
297 described above. To validate these *RepeatModeler* consensus sequences for *D. innubila*, we  
298 mapped Illumina data to the TE library and kept only TE sequences with at least 1x the genomic  
299 coverage across 80% of the sequence (BWA MEM, default parameters [79, 80]).

300 For each species, we then generated a custom reference genome required for the use of  
301 *PopoolationTE2* [34]. For this we merged the masked reference genome, the custom TE library  
302 used for masking and the genome TE sequences, extracted using *BEDTools* [38]. Next, as  
303 described in the *PopoolationTE2* manual, we generated a hierarchy for each genome which  
304 assigned each TE sequence (all consensus sequences and reference sequences) to a TE family and  
305 TE order as described in [5, 77], either terminal inverted repeat (TIR) and rolling circle (RC) DNA  
306 transposons, or long terminal repeat (LTR) and long interspersed nuclear element (LINE) RNA  
307 retrotransposons.

308

## 309 **TE content and copy number differences between genomes**

310 We quantified the amount of TE content for all species in three ways: a) proportion of the reference  
311 genome masked with *RepeatMasker*, b) median insertion count of each TE family across all lines  
312 in a species and c) median insertion count of each family using *PopoolationTE2*. For b), we found  
313 the median coverage for each TE family and the median coverage masked nuclear genome using  
314 *BEDTools* (*genomeCoverageBed*) [38], we divided the median TE coverage by the median nuclear  
315 coverage (subsampling to 15x coverage) to find the copy number of each family. Then we  
316 calculated the median adjusted TE coverage across all lines for each species. For c), we calculated  
317 the median TE insertion count for each family in each species, based on TE insertions called using  
318 *PopoolationTE2*. To control for differences in genome size across euchromatic regions, we also  
319 calculated the insertions per 1 Megabase windows (sliding 250kbp) for each TE order in each line  
320 for each species, only for contigs greater than 100kbp with less than 60% of the window masked  
321 by *RepeatMasker* [36, 37].

322

## 323 **Calling transposable element insertions across genomes**

324 To identify the TE insertions throughout the genome in each line for each species, we followed  
325 the recommended *PopoolationTE2* pipeline for each species ([sourceforge.net/p/popoolation-  
326 te2/wiki/Walkthrough/](http://sourceforge.net/p/popoolation-te2/wiki/Walkthrough/)) [34]. Though *PopoolationTE2* is designed for use with population pools,  
327 we used an adjusted method to call germline insertions in individuals. We subsampled each line  
328 to 15x average nuclear coverage and followed the pipeline with appropriate cutoffs to exclude  
329 most somatic transpositions (map-qual = 15, min-count = 5, min-distance = -200, max-distance =  
330 500). *PopoolationTE2* gives an estimated frequency of the insertion based on coverage of the TE  
331 breakpoint versus the genomic coverage, here we used this as a support score for each TE insertion  
332 [34]. We removed insertions found exclusively in one line with lower than 50% frequency in an  
333 individual line, we then merged all remaining insertion files for each species. We also removed all  
334 insertions in regions with more than 60% of the Megabase window masked by *RepeatMasker* [36,  
335 37], we also limited our analysis to scaffolds associated with autosomes in all species.

336 We used *BEDTools* [38] to estimate the frequencies of each family's insertions across each  
337 species, combining TE insertions of the same family within 100bp of each other. We used a  
338 binomial GLM in R [81] to assess differences in insertion frequencies between species for each  
339 TE order, considering a significant effect of species compared to *D. melanogaster* for a p-value <

340 0.05 for each set of TE order insertion frequencies. If all species have a significant effect in a  
341 consistent direction, we consider this to be a significant effect of *D. melanogaster* on insertion  
342 frequency. We also compared the median insertion frequency across species and TE orders and  
343 again fit a GLM to compare in R [81].

344 For a less bias comparison of insertion frequency spectra, we limited our analyses to  
345 genomes with data generated in similar fashions (*D. melanogaster*, *D. ananassae*, *D. willistoni*),  
346 and to orthologous euchromatic regions of the genome. For this we used *progressiveMauve* to  
347 identify orthologous regions of each genome [45], then converted these regions into a bedfile and  
348 excluded regions below 100kb, with over 60% of bases masked. We excluded *D. innubila* from  
349 this comparison due to its high sequence divergence from all other species and difficulty in finding  
350 similar TE families in other species, and *D. pseudoobscura* as it only its Muller element C  
351 represented natural variation. We then extracted insertions found in the orthologous regions using  
352 *BEDTools* [38] to compare insertion frequency spectra in orthologous regions.

353

#### 354 **Polymorphism and summary statistics across the host genome and TE sequences**

355 We called polymorphism across the host nuclear genome using *GATK HaplotypeCaller* [82] for  
356 each host and found the nuclear site frequency spectrum for each species using this data, which  
357 we confirmed using *ANGSD* (folded spectra, bootstraps = 100, reference sequence given, ancestral  
358 sequence not used) [83]. *ANGSD* was also used to perform a principle component analysis  
359 between samples in each species to look for population substructure [83].

360

#### 361 **Estimating the effective population size of species**

362 We used the previously generated folded site-frequency spectra from *ANGSD* in *StairwayPlot* for  
363 *D. melanogaster*, *D. innubila*, *D. ananassae* and *D. willistoni* (excluding *D. pseudoobscura* due to  
364 the method of the data generation) [83, 84]. For each estimated effective population size back in  
365 time, we found the harmonic mean of the effective size in the past 100,000 years and took that as  
366 the average size for the line. We then compared the TE copy number estimations to effective  
367 population size.

368

#### 369 **TE families with dynamics differing between species**

370 We next wanted to identify TE families shared between species to identify differences in activity  
371 between species. We aligned families of the same superfamily (defined in the *Rebase* TE database  
372 [77]) from each species using *MAFFT* and considered families within 95% identity to be the same  
373 family in different species [85]. We then checked these matching TE families manually to make  
374 sure family groupings were correct and removed an error grouping of *D. ananassae* P-Galileo  
375 element with *D. willistoni* and *melanogaster* P-element. All other groupings appeared to make  
376 sense and sequence showed high levels of similarity. We then compared the site frequency  
377 spectrum of these species using a logistic regression GLM. We also tested for differences in  
378 population genetic statistics to assess if differences are due to the recent acquisition of a family in  
379 a species. We calculated Watterson's theta, pairwise diversity and Tajima's D using *Popoolation*  
380 and estimated TE family copy number based on coverage [53], then compared these statistics  
381 across family and species using a generalized linear model, noting significant interactions between  
382 species and TE family.

383

#### 384 **Abbreviations**

385 TE = transposable element, TIR = terminal inverted repeat, LTR = long terminal repeat, LINE =  
386 long interspersed nuclear element, RC = rolling circle, GLM – generalized linear model, IFS =  
387 insertion frequency spectra.

388

#### 389 **Declarations**

390 *Ethics approval and consent to participate*

391 Not applicable

392 *Consent for publication*

393 Not applicable

394 *Funding*

395 This work was supported by a postdoctoral fellowship from the Max Kade foundation (Austria), a  
396 K-INBRE postdoctoral grant (NIH Grant P20 GM103418) to TH and NIH Grant R00 GM114714  
397 to Rob Unckless, funding TH.

398

399 *Competing Interests*

400 The author declares that they have no competing interests.

401 *Authors' contributions*

402 TH performed bioinformatics analysis, statistical analysis, wrote, read and approved the  
403 manuscript.

404 *Data availability*

405 *D. pseudoobscura* data available on NCBI SRA: SRR617430- SRR617474. *D. melanogaster* data  
406 available on NCBI SRA: SRR203500-10, SRR204006-12. *D. ananassae*, *D. willistoni* and *D.*  
407 *innubila* data will be made available upon publication. *Drosophila* genomes can be downloaded  
408 from Flybase.org or NCBI. All data is available upon request before acceptance.

409

410 *Acknowledgements*

411 We are extremely grateful for the advice provided by R. Unckless and J. Blumenstiel, for providing  
412 the sequencing information, advice on analysis and the production of the manuscript. We are also  
413 grateful for helpful discussion provided by J. R. Chapman, A. J. Betancourt, C. Schlotterer, R.  
414 Kofler, and B. Charlesworth. Thanks for S. W. Schaeffer for providing the *D. pseudoobscura* data  
415 used in this survey and advice concerning how the data should be used. Finally, we thank two  
416 anonymous reviewers and an anonymous editor for their suggestions and comments on the  
417 manuscript which has greatly improved the writing, science and interpretation of results.

418



419 **Figure 1:** Schematic depicting the model explaining the differences in TE abundance and insertion  
420 frequency spectra across species, with species analyzed previously in red, species analyzed here  
421 in blue. Species have been placed in the schematic based on 1 – the insertion frequency spectrum  
422 relative to mammals and *D. melanogaster*, and 2 – TE abundances compared to mammals and *D.*  
423 *melanogaster*.

424

425 **Figure 2.** Transposable Element content (separated by TE order) in populations of five  
426 *Drosophila* species. TE content shown as **A.** Cartoon of tree of species assessed here, branches  
427 do not accurately represent the distance between species. **B.** Estimated TE profiles including TE  
428 proportions of each genome, median TE coverage, weighted by median nuclear coverage, and  
429 median TE insertion number. TIR and RCs were combined due to small numbers of either for  
430 many species. **C.** TE density per 1 Mb windows across the genome for each species and TE  
431 order.

432

433 **Figure 3:** Average insertion frequency spectra for each species, separated by TE order for, **A.** TE  
434 insertions found across total genomes of all species. **B.** TE insertions called in orthologous regions  
435 for *D. melanogaster*, *D. willistoni* and *D. ananassae*.

436 **Table S1:** Table of *Drosophila* strains used in this study, including information on species,  
437 collection location and SRA number.

438 **Table S2:** Comparison of TE insertion frequencies between species and the fit of GLMs at different  
439 levels showing significant differences between species.

440 **Table S3:** TE insertions across the analysed scaffolds for each of the five species analysed here,  
441 with TE family, superfamily, order and TE insertion site occupancy.

442 **Table S4:** TEs showing significant differences in distributions between species and the median  
443 Tajima's D for each species to see if a recent horizontal acquisition was the cause of this difference.  
444 NA is given if the TE family is absent from the species in question.

445 **Table S5:** Table of GLM results for differences in IFS between TE families shared across *D.*  
446 *ananassae*, *melanogaster* and *willistoni* in shared regions of the genome.

447 **Figure S1. A.** Insertion frequency spectrum, plots showing the densities of insertions and the  
448 proportion of the population these insertions are found in. These spectra are estimated using  
449 *PopoolationTE2* for each species, separated by TE order. **B.** Insertion frequency spectrum of TE  
450 insertions for regions with high similarity, identified using *progressiveMauve*.

451 **Figure S2:** Site frequency spectra the nuclear genome of species analyzed here, calculated using  
452 ANGSD. The theoretical neutral site frequency spectrum is layered on top in red.

453 **Figure S3:** Principle component analysis for nuclear polymorphism for each species.  
454 Subpopulations are colored differently when known. E.G. Muller C inversion karyotype for *D.*  
455 *pseudoobscura* and Arizona sky island place of collection for *D. innubila* (both colored arbitrarily).  
456 Circled clusters are the lines used in the subset analysis, chosen arbitrarily based on the clustering  
457 seen in the PCAs. TE copy number for each species (+- 2 \* standard deviations) is also compared  
458 to estimated effective population size from *StairwayPlot*.

459 **Figure S4:** Insertion frequency per species for shared TE superfamilies'.

460 **Figure S5:** Site frequency spectrum of TEs shared between species that are significantly different  
461 in at least one comparison. Spectra are weighted by copy number. These are the 9 of 55  
462 comparisons to show significant differences in distribution between species. The peak at ~60% in  
463 Harbinger-1 in *D. willistoni* is caused by a small number of insertions at 60% frequency and low  
464 insertion numbers found in the *D. willistoni*.

465 **Data S1:** TE sequences used in this study to determine repetitive content of each species.

466 **Data S2:** TE hierarchy for each species, separated by species. Hierarchy gives the specific  
467 sequence, the TE family it belongs to and its order.

468

## 469 **Bibliography**

470

- 471 1. McClintock B: **Induction of instability at selected loci in Maize.** *Genetics* 1953, **38**:579-  
472 599.
- 473 2. McClintock B: **The origin and behavior of mutable loci in Maize.** *Proc Natl Acad of Sci*  
474 *USA* 1950, **36**:344-355.
- 475 3. Charlesworth B, Langley CH: **The population genetics of *Drosophila* transposable**  
476 **elements.** *Annual review of genetics* 1989, **23**:251-287.
- 477 4. Burt A, Trivers R: **Genes in Conflict.** 2006.
- 478 5. Wicker T, Sabot F, Hua-Van A, Bennetzen JL, Capy P, Chalhoub B, Flavell A, Leroy P,  
479 Morgante M, Panaud O *et al*: **A unified classification system for eukaryotic**  
480 **transposable elements.** *Nature reviews Genetics* 2007, **8**:973-982.
- 481 6. Hellen EHB, Brookfield JFY: **The diversity of class II transposable elements in**  
482 **mammalian genomes has arisen from ancestral phylogenetic splits during ancient**  
483 **waves of proliferation through the genome.** *Molecular Biology and Evolution* 2013,  
484 **30**:100-108.
- 485 7. Hellen EHB, Brookfield JFY: **Transposable element invasions.** *Mobile genetic elements*  
486 2013, **3**:e23920.
- 487 8. Gregory TR: **Synergy between sequence and size in large-scale genomics.** *Nature*  
488 *reviews Genetics* 2005, **6**:699-708.
- 489 9. Charlesworth B, Langley CH, Sniegowski PD: **Transposable element distributions in**  
490 ***Drosophila*.** *Genetics* 1997, **147**:1993-1995.
- 491 10. Lee YCG, Langley CH: **Transposable elements in natural populations of *Drosophila***  
492 ***melanogaster*.** *Philosophical Transactions of the Royal Society B: Biological Sciences*  
493 2010, **365**:1219-1228.
- 494 11. Lee YCG, Langley CH: **Long-term and short-term evolutionary impacts of**  
495 **transposable elements on *Drosophila*.** *Genetics* 2012, **192**:1411-1432.
- 496 12. Blumenstiel JP: **Evolutionary dynamics of transposable elements in a small RNA**  
497 **world.** *Trends in Genetics* 2011, **27**:23-31.
- 498 13. Lu J, Clark AG: **Population dynamics of PIWI-interacting RNAs ( piRNAs ) and their**  
499 **targets in *Drosophila*.** *Genome Research* 2010, **20**:212-227.
- 500 14. Brennecke J, Aravin AA, Stark A, Dus M, Kellis M, Sachidanandam R, Hannon GJ:  
501 **Discrete small RNA-generating loci as master regulators of transposon activity in**  
502 ***Drosophila*.** *Cell* 2007, **128**:1089-1103.
- 503 15. Aravin AA, Hannon GJ, Brennecke J: **The piwi-piRNA pathway provides an adaptive**  
504 **defense in the transposon arms race.** *Science* 2007, **318**:761-764.
- 505 16. Brennecke J, Malone CD, Aravin AA, Sachidanandam R, Stark A, Hannon GJ: **An**  
506 **epigenetic role for maternally inherited piRNAs in transposon silencing.** *Science (New*  
507 *York, NY)* 2008, **322**:1387-1392.

- 508 17. Senti KA, Jurczak D, Sachidanandam R, Brennecke J: **piRNA-guided slicing of**  
509 **transposon transcripts enforces their transcriptional silencing via specifying the**  
510 **nuclear piRNA repertoire.** *Genes and Development* 2015, **29**:1747-1762.
- 511 18. Obbard DJ, Gordon KHJ, Buck AH, Jiggins FM: **The evolution of RNAi as a defence**  
512 **against viruses and transposable elements.** *Philosophical transactions of the Royal*  
513 *Society of London Series B, Biological sciences* 2009, **364**:99-115.
- 514 19. Lee YCG: **The role of piRNA-mediated epigenetic silencing in the population**  
515 **dynamics of transposable elements in *Drosophila melanogaster*.** *PLOS Genetics* 2015,  
516 **11**:1-24.
- 517 20. Langley CH, Montgomery E, Hudson R, Kaplan N, Charlesworth B: **On the role of**  
518 **unequal exchange in the containment of transposable element copy number.** *Genetical*  
519 *Research* 1988, **52**:223-235.
- 520 21. Kofler R, Betancourt AJ, Schlötterer C: **Sequencing of pooled DNA Samples ( Pool-Seq**  
521 **) uncovers complex dynamics of transposable element insertions in *Drosophila***  
522 ***melanogaster*.** *PloS Genetics* 2012, **8**:1-16.
- 523 22. Kofler R, Nolte V, Schlötterer C: **Tempo and mode of transposable element activity in**  
524 ***Drosophila*.** *PLoS Genet* 2015, **11**:e1005406.
- 525 23. Clark AG, Eisen MB, Smith DR, Bergman CM, Oliver B, Markow Ta, Kaufman TC, Kellis  
526 M, Gelbart W, Iyer VN *et al*: **Evolution of genes and genomes on the *Drosophila***  
527 **phylogeny.** *Nature* 2007, **450**:203-218.
- 528 24. Senti KA, Brennecke J: **The piRNA pathway: A fly's perspective on the guardian of**  
529 **the genome.** *Trends in Genetics* 2010, **26**:499-509.
- 530 25. Petrov Da, Fiston-Lavier A-S, Lipatov M, Lenkov K, González J: **Population genomics**  
531 **of transposable elements in *Drosophila melanogaster*.** *Molecular Biology and Evolution*  
532 2011, **28**:1633-1644.
- 533 26. Markow TA, O'Grady P: ***Drosophila*: a guide to species identification.** 2006.
- 534 27. Markow TA, O'Grady PM: ***Drosophila* biology in the genomic age.** *Genetics* 2007,  
535 **177**:1269-1276.
- 536 28. Sessegolo C, Burlet N, Haudry A, Biémont C, Vieira C, Tenaillon M, Hollister J, Gaut B,  
537 McClintock B, Mackay T *et al*: **Strong phylogenetic inertia on genome size and**  
538 **transposable element content among 26 species of flies.** *Biology letters* 2016, **12**:521-  
539 524.
- 540 29. Adrion JR, Begun DJ, Hahn MW: **Patterns of transposable element variation and**  
541 **clinality in *Drosophila*.** *Mol Ecol* 2019, **28**(6):1523-1536.
- 542 30. Kofler R, Hill T, Nolte V, Betancourt AJ, Schlötterer C: **The recent invasion of natural**  
543 ***Drosophila simulans* populations by the P-element.** *Proceedings of the National*  
544 *Academy of Sciences* 2015, **112**:6659-6663.
- 545 31. Hey J: **The transposable portion of the genome of *Drosophila algonquin* is very**  
546 **different from that in *Drosophila melanogaster*.** *Molecular Biology and Evolution* 1989,  
547 **6**:66-79.
- 548 32. Palmieri N, Kosiol C, Schlötterer C: **The life cycle of *Drosophila* orphan genes.** *eLife*  
549 2014, **3**:1-21.
- 550 33. McGaugh SE, Heil CSS, Manzano-Winkler B, Loewe L, Goldstein S, Himmel TL, Noor  
551 MaF: **Recombination modulates how selection affects linked sites in *Drosophila*.** *PLoS*  
552 *biology* 2012, **10**:1-17.

- 553 34. Kofler R, Daniel G, Schl C: **PoPoolationTE2 : comparative population genomics of**  
554 **transposable elements using Pool-Seq.** 2016:1-7.
- 555 35. Quesneville H, Bergman CM, Andrieu O, Autard D, Nouaud D, Ashburner M,  
556 Anxolabéhère D: **Combined evidence annotation of transposable elements in genome**  
557 **sequences.** *PLoS Computational Biology* 2005, **1**:0166-0175.
- 558 36. Smit AFA, Hubley R: **RepeatMasker Open-4.0**; 2015.
- 559 37. Tarailo-Graovac M, Chen N: **Using RepeatMasker to identify repetitive elements in**  
560 **genomic sequences.** *Current Protocols in Bioinformatics* 2009.
- 561 38. Quinlan AR, Hall IM: **BEDTools: a flexible suite of utilities for comparing genomic**  
562 **features.** *Bioinformatics (Oxford, England)* 2010, **26**:841-842.
- 563 39. Hill T, Koseva B, Unckless RL: **The genome of *Drosophila innubila* reveals lineage-**  
564 **specific patterns of selection in immune genes.** *Molecular Biology and Evolution* 2019:1-  
565 36.
- 566 40. Smit AFA, Hubley R: **RepeatModeler Open-1.0.** 2008.
- 567 41. Bao W, Kojima KK, Kohany O: **Rebase Update, a database of repetitive elements in**  
568 **eukaryotic genomes.** *Mobile DNA* 2015, **6**:4-9.
- 569 42. Gregory TR, Johnston JS: **Genome size diversity in the family *Drosophilidae*.** *Heredity*  
570 2008, **101**:228-238.
- 571 43. Leung W, Students P: **Retrotransposons Are the Major Contributors to the Expansion**  
572 **of the *Drosophila ananassae* Muller F.** *G3* 2017, **7**:2439-2460.
- 573 44. Levine MT, Malik HS: **Learning to protect your genome on the fly.** *Cell* 2011, **147**:1440-  
574 1441.
- 575 45. Darling ACE, Mau B, Blattner FR, Perna NT: **Mauve : Multiple Alignment of Conserved**  
576 **Genomic Sequence With Rearrangements.** 2004:1394-1403.
- 577 46. Wallace AG, Detweiler D, Schaeffer SW: **Evolutionary history of the third chromosome**  
578 **gene arrangements of *Drosophila pseudoobscura* inferred from inversion breakpoints.**  
579 *Molecular biology and evolution* 2011, **28**:2219-2229.
- 580 47. Fuller ZL, Haynes GD, Richards S, Schaeffer SW: **Genomics of Natural Populations:**  
581 **How Differentially Expressed Genes Shape the Evolution of Chromosomal Inversions**  
582 **in.** *Genetics* 2016.
- 583 48. Dobzhansky T: **Genetics and the origin of species.** 1937:364.
- 584 49. Dobzhansky T, Epling C: **The suppression of crossing over in inversion heterozygotes**  
585 **of *Drosophila pseudoobscura*.** *Proceedings of the National Academy of Sciences of the*  
586 *United States of America* 1948, **34**:137-141.
- 587 50. Dobzhansky T, Sturtevant AH: **Inversions In Chromosomes of *Drosophila***  
588 ***pseudoobscura*.** *Genetics* 1937, **23**:28-64.
- 589 51. Lynch M, Conery JS: **The Origins of Genome Complexity.** *Science* 2003, **302**:1401-  
590 1404.
- 591 52. Bergman CM, Haddrill PR: **Strain-specific and pooled genome sequences for**  
592 **populations of *Drosophila melanogaster* from three continents .** *F1000 Research* 2015,  
593 **31**:1-5.
- 594 53. Kofler R, Orozco-terWengel P, de Maio N, Pandey RV, Nolte V, Futschik A, Kosiol C,  
595 Schlötterer C: **Popoolation: A toolbox for population genetic analysis of next**  
596 **generation sequencing data from pooled individuals.** *PLoS ONE* 2011, **6**.
- 597 54. Tajima F: **Statistical method for testing the neutral mutation hypothesis by DNA**  
598 **polymorphism.** *Genetics* 1989, **123**:585-595.



- 599 55. Bartolomé C, Bello X, Maside X: **Widespread evidence for horizontal transfer of**  
600 **transposable elements across *Drosophila* genomes.** *Genome biology* 2009, **10**:R22.
- 601 56. Daniels SB, Peterson KR, Strausbaugh LD, Kidwell MG, Chovnick A: **Evidence for**  
602 **horizontal transmission of the P transposable element between *Drosophila* species.**  
603 *Genetics* 1990, **124**:339-355.
- 604 57. Daniels SB, Strausbaugh LD: **The distribution of P-element sequences in *Drosophila*:**  
605 **The *willistoni* and *saltans* species groups.** 1986, **23**:138-148.
- 606 58. Khurana JS, Wang J, Xu J, Koppetsch BS, Thomson TC, Nowosielska A, Li C, Zamore  
607 PD, Weng Z, Theurkauf WE: **Adaptation to P-element transposon invasion in**  
608 ***Drosophila melanogaster*.** *Cell* 2011, **147**:1551-1563.
- 609 59. Doolittle WF, Sapienza C: **Selfish genes, the phenotype paradigm and genome**  
610 **evolution.** *Nature* 1980, **284**:601-603.
- 611 60. Bachmann A, Knust E: **The use of P-element transposons to generate transgenic flies.**  
612 *Methods in Molecular Biology* 2008, **420**:61-77.
- 613 61. Orgel LE, Crick FHC: **Selfish DNA: the ultimate parasite.** *Nature* 1980, **284**:604-607.
- 614 62. Lisch D, Bennetzen JL: **Transposable element origins of epigenetic gene regulation.**  
615 *Current Opinion in Plant Biology* 2011, **14**:156-161.
- 616 63. Sniegowski PD, Charlesworth B: **Transposable element numbers in cosmopolitan**  
617 **inversions from a natural population of *Drosophila melanogaster*.** *Genetics* 1994,  
618 **137**:815-827.
- 619 64. Montgomery EA, Huang S, Langley CH, Judd BH: **Chromosome rearrangement by**  
620 **ectopic recombination in *Drosophila melanogaster*: genome structure and evolution.**  
621 *Genetics* 1991, **129**:1085-1098.
- 622 65. Pasyukova EG, Nuzhdin SV, Morozova TV, Mackay TFC: **Accumulation of**  
623 **transposable elements in the genome of *Drosophila melanogaster* is associated with a**  
624 **decrease in fitness.** *The Journal of heredity* 2004, **95**:284-290.
- 625 66. Petrov DA, Aminetzach YT, Davis JC, Bensasson D, Hirsh AE: **Size matters: Non-LTR**  
626 **retrotransposable elements and ectopic recombination in *Drosophila*.** *Molecular*  
627 *Biology and Evolution* 2003, **20**:880-892.
- 628 67. Kaminker JS, Bergman CM, Kronmiller B, Svirskas R, Patel S, Frise E, David A, Lewis  
629 SE, Rubin GM, Ashburner M *et al*: **The transposable elements of the *Drosophila***  
630 ***melanogaster* euchromatin : a genomics perspective.** *Genome Biology* 2002, **3**:1-20.
- 631 68. Bergman CM, Bensasson D: **Recent LTR retrotransposon insertion contrasts with**  
632 **waves of non-LTR insertion since speciation in *Drosophila melanogaster*.** *Proceedings*  
633 *of the National Academy of Sciences of the United States of America* 2007, **104**:11340-  
634 11345.
- 635 69. Hill T, Betancourt A: **Extensive horizontal exchange of transposable elements in the**  
636 ***Drosophila pseudoobscura* group.** *Mobile DNA* 2018, **20**:1-14.
- 637 70. Nanda S, Jayan G, Voulgaropoulou F, Sierra-Honigmann AM, Uhlenhaut C, McWatters  
638 BJP, Patel A, Krause PR: **Universal virus detection by degenerate-oligonucleotide**  
639 **primed polymerase chain reaction of purified viral nucleic acids.** *Journal of*  
640 *Virological Methods* 2008, **152**:18-24.
- 641 71. Baym M, Kryazhimskiy S, Lieberman TD, Chung H, Desai MM, Kishony R: **Inexpensive**  
642 **multiplexed library preparation for megabase-sized genomes.** *PLoS ONE* 2015:1-15.
- 643 72. Hill T, Unckless RL: **The dynamic evolution of *Drosophila innubila* Nudivirus.**  
644 *Infection, Genetics and Evolution* 2017:1-25.

- 645 73. Joshi N, Fass J: **Sickle: A sliding window, adaptive, quality-based trimming tool for**  
646 **fastQ files.** 2011, **1:33.**
- 647 74. Buffalo V: **Scythe**; 2018.
- 648 75. Dos Santos G, Schroeder AJ, Goodman JL, Strelets VB, Crosby MA, Thurmond J, Emmert  
649 DB, Gelbart WM, Brown NH, Kaufman T *et al*: **FlyBase: Introduction of the *Drosophila***  
650 ***melanogaster* Release 6 reference genome assembly and large-scale migration of**  
651 **genome annotations.** *Nucleic Acids Research* 2015, **43:D690-D697.**
- 652 76. Gramates LS, Marygold SJ, Dos Santos G, Urbano JM, Antonazzo G, Matthews BB, Rey  
653 AJ, Tabone CJ, Crosby MA, Emmert DB *et al*: **FlyBase at 25: Looking to the future.**  
654 *Nucleic Acids Research* 2017, **45:D663-D671.**
- 655 77. Kohany O, Gentles AJ, Hankus L, Jurka J: **Annotation, submission and screening of**  
656 **repetitive elements in Repbase: RepbaseSubmitter and Censor.** *BMC bioinformatics*  
657 2006, **7:474.**
- 658 78. Altschul SF, Gish W, Miller W, Myers EW, Lipman DJ: **Basic local alignment search**  
659 **tool.** *Journal of Molecular Biology* 1990, **215:403-410.**
- 660 79. Li H, Handsaker B, Wysoker A, Fennell T, Ruan J, Homer N, Marth G, Abecasis GR,  
661 Durbin R: **The sequence alignment/map format and SAMtools.** *Bioinformatics (Oxford,*  
662 *England)* 2009, **25:2078-2079.**
- 663 80. Li H, Durbin R: **Fast and accurate short read alignment with Burrows-Wheeler**  
664 **transform.** *Bioinformatics (Oxford, England)* 2009, **25:1754-1760.**
- 665 81. Team RC: **R: A Language and Environment for Statistical Computing.** Vienna,  
666 Austria: R Foundation for Statistical Computing; 2013.
- 667 82. DePristo MA, Banks E, Poplin R, Garimella KV, Maguire JR, Hartl C, Philippakis AA,  
668 del Angel G, Rivas MA, Hanna M *et al*: **A framework for variation discovery and**  
669 **genotyping using next-generation DNA sequencing data.** *Nature genetics* 2011, **43:491-**  
670 **498.**
- 671 83. Korneliussen TS, Albrechtsen A, Nielsen R: **ANGSD: Analysis of Next Generation**  
672 **Sequencing Data.** *BMC Bioinformatics* 2014, **15:356.**
- 673 84. Liu X, Fu Y-X: **Exploring population size changes using SNP frequency spectra.**  
674 *Nature genetics* 2015, **47:555-559.**
- 675 85. Katoh K, Misawa K, Kuma K-i, Miyata T: **MAFFT: a novel method for rapid multiple**  
676 **sequence alignment based on fast Fourier transform.** *Nucleic acids research* 2002,  
677 **30:3059-3066.**  
678



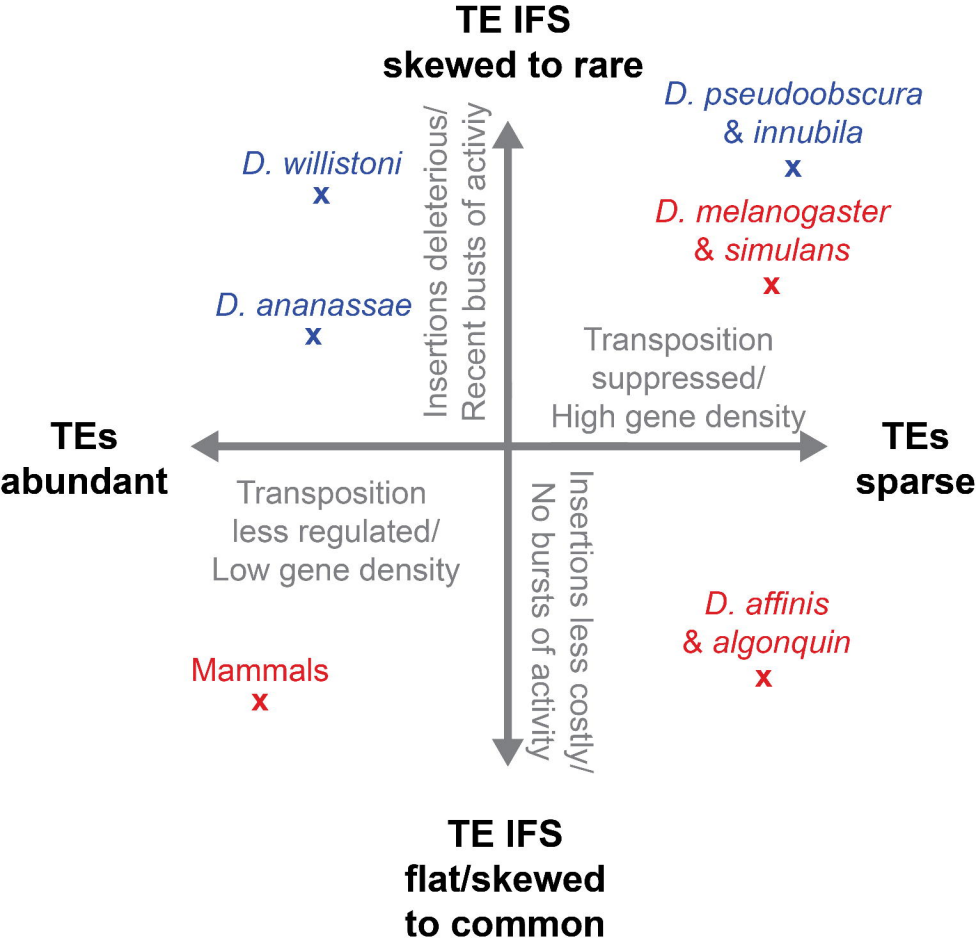

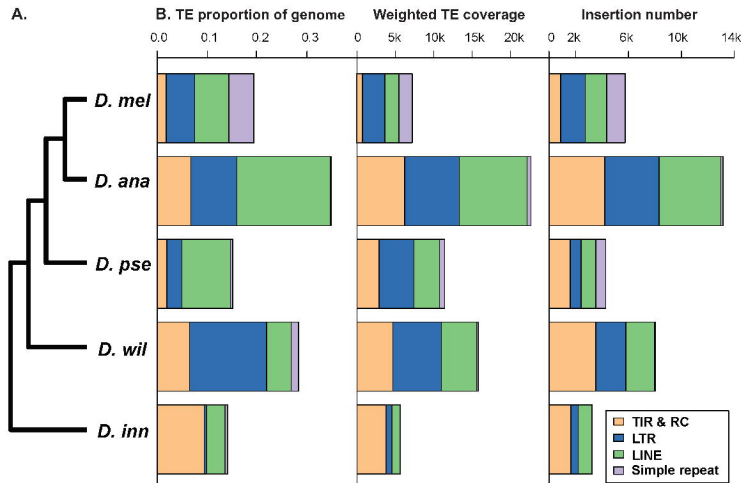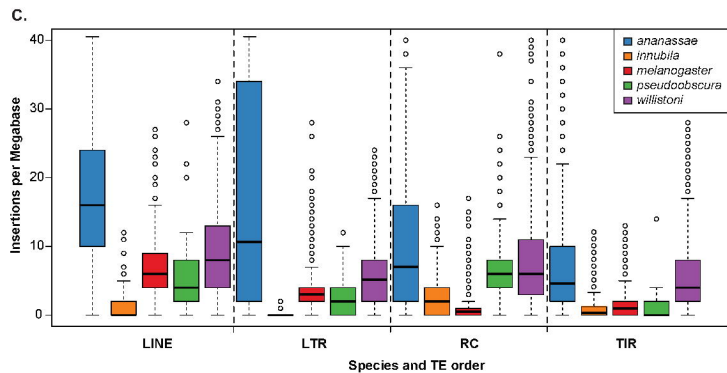

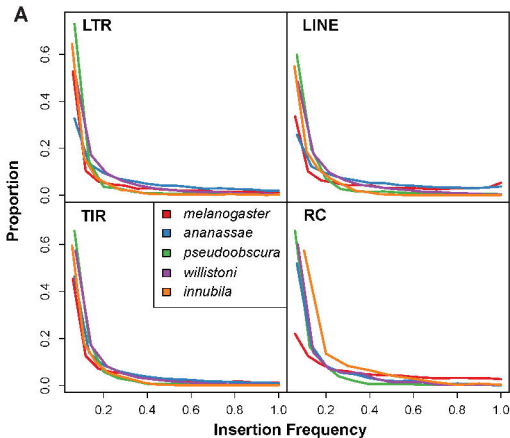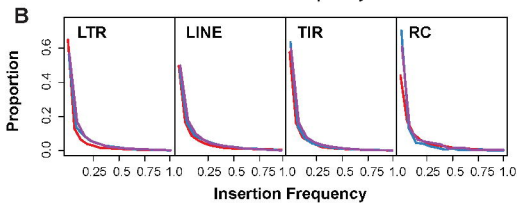

Source: https://www.biorxiv.org/content/biorxiv/early/2019/07/26/651059.full.pdf
